# Supplementary material for: Theoretical insights into structure, bonding, reactivity and importance of ion-pair interactions in Kirby's tetrafluoroboric acid salts of twisted amides
Source: Royal Society of Chemistry journal article supplement (doi:10.1039/c5ra22792e), 2015-01-01
Supplement: c5ra22792e1.pdf [file c5ra22792e1.pdf]

**Theoretical insights into structure, bonding, reactivity and importance of ion-pair interactions in Kirby<sup>®</sup>s tetrafluoroboric acid salts of twisted amides**

**Krishna K. Pandey**

**School of Chemical Sciences, D. A. University Indore, Khandwa Road Campus, Indore  
452 017, India**

**Supporting Information**

**Table S1.** Energies (in Hartree) of the amides (1-3), products of hydrolyses (4-7), transition states (8,9), cations (1<sup>+</sup>-3<sup>+</sup>), [BF<sub>4</sub>]<sup>-</sup> and water.

|                                 | Energy       |           |              |              |
|---------------------------------|--------------|-----------|--------------|--------------|
|                                 | Gas-phase    | Disp      | Methanol     | Acetonitrile |
| <b>(1)</b>                      |              |           |              |              |
| PBE-D3(BJ)                      | -905.203138  | -0.037741 |              |              |
| PBE0-D3(BJ)                     | -905.259820  | -0.033263 | -905.294931  | -905.295176  |
| TPSS-D3(BJ)                     | -906.339605  | -0.047373 |              |              |
| TPSSH-D3(BJ)                    | -906.250163  | -0.044092 |              |              |
| <b>(2)</b>                      |              |           |              |              |
| PBE-D3(BJ)                      | -944.481850  | -0.042235 |              |              |
| PBE0-D3(BJ)                     | -944.546366  | -0.037320 | -944.580977  | -944.581219  |
| TPSS-D3(BJ)                     | -945.681865  | -0.053022 |              |              |
| TPSSH-D3(BJ)                    | -945.589181  | -0.049402 |              |              |
| <b>(3)</b>                      |              |           |              |              |
| PBE-D3(BJ)                      | -1023.038753 | -0.051421 |              |              |
| PBE0-D3(BJ)                     | -1023.118924 | -0.045660 | -1023.152744 | -1023.152979 |
| TPSS-D3(BJ)                     | -1024.366619 | -0.064606 |              |              |
| TPSSH-D3(BJ)                    | -1024.266632 | -0.060279 |              |              |
| <b>(4)</b>                      |              |           |              |              |
| PBE0-D3(BJ)                     | -981.673895  | -0.036525 |              | -981.706280  |
| <b>(5)</b>                      |              |           |              |              |
| PBE0-D3(BJ)                     | -1020.957669 | -0.041024 |              | -1020.988798 |
| <b>(6)</b>                      |              |           |              |              |
| PBE0-D3(BJ)                     | -1020.953706 | -0.041804 |              | -1020.988631 |
| <b>(7)</b>                      |              |           |              |              |
| PBE0-D3(BJ)                     | -1099.526562 | -0.050246 |              | -1099.561500 |
| <b>(1<sup>+</sup>)</b>          |              |           |              |              |
| PBE0-D3(BJ)                     | -480.791764  | -0.027560 | -480.878626  | -480.879174  |
| <b>(2<sup>+</sup>)</b>          |              |           |              |              |
| PBE0-D3(BJ)                     | -520.079653  | -0.031569 | -520.164562  | -520.165100  |
| <b>(3<sup>+</sup>)</b>          |              |           |              |              |
| PBE0-D3(BJ)                     | -598.653675  | -0.039744 | -598.735962  | -598.736486  |
| [BF <sub>4</sub> ] <sup>-</sup> |              |           |              |              |
| PBE0-D3(BJ)                     | -424.313600  | -0.001483 | -424.407606  | -424.408182  |
| H <sub>2</sub> O                |              |           |              |              |
| PBE0-D3(BJ)                     | -76.381111   | -0.000277 |              | -76.392227   |

Table S2. Numerical Frequencies (cm<sup>-1</sup>) and enthalpies of amides (**1-3**), hydrolysis products (**4-7**) and transition states (**8, 9**) at DFT/PBE-D3(BJ) in acetonitrile.

**1-Azatricyclo[3.3.1.1<sup>3,7</sup>]decan-2-one, tetrafluoroboric acid salt (1)**

The IR spectrum

| wavenumber | T**2     |
|------------|----------|
| 22.59      | 0.4861   |
| 53.99      | 1.4722   |
| 61.50      | 5.1176   |
| 71.00      | 0.2984   |
| 88.15      | 10.1280  |
| 107.60     | 7.3856   |
| 176.15     | 38.0423  |
| 270.98     | 2.1570   |
| 274.07     | 4.2863   |
| 331.11     | 0.1734   |
| 353.62     | 7.1343   |
| 359.29     | 2.0915   |
| 364.49     | 0.3173   |
| 385.08     | 0.2911   |
| 423.13     | 5.6874   |
| 433.56     | 16.9584  |
| 465.40     | 43.5342  |
| 482.61     | 15.4873  |
| 483.95     | 9.1238   |
| 503.34     | 46.8857  |
| 574.46     | 78.3162  |
| 611.66     | 37.4127  |
| 624.47     | 0.0509   |
| 687.75     | 54.3342  |
| 700.02     | 98.9735  |
| 761.99     | 0.3659   |
| 768.95     | 17.8418  |
| 805.02     | 2.4767   |
| 816.01     | 94.7897  |
| 844.11     | 247.6080 |
| 848.08     | 64.5144  |
| 872.62     | 4.7345   |
| 881.23     | 0.8191   |
| 896.91     | 5.6420   |
| 942.09     | 12.1384  |
| 948.36     | 13.3099  |
| 978.27     | 2.6811   |
| 999.97     | 117.3191 |
| 1004.17    | 55.7239  |
| 1009.93    | 349.9247 |
| 1025.02    | 170.2227 |
| 1032.47    | 0.3054   |
| 1060.40    | 2.6699   |
| 1081.84    | 3.0648   |
| 1087.12    | 0.0913   |
| 1098.81    | 50.6453  |
| 1138.48    | 23.6969  |

|         |           |
|---------|-----------|
| 1155.56 | 99.0420   |
| 1158.64 | 500.8882  |
| 1189.36 | 13.1908   |
| 1224.43 | 6.3351    |
| 1240.35 | 9.6688    |
| 1267.90 | 8.1087    |
| 1279.95 | 13.8495   |
| 1297.31 | 5.9513    |
| 1299.27 | 2.9939    |
| 1301.23 | 8.0276    |
| 1320.91 | 0.7743    |
| 1328.28 | 4.7505    |
| 1333.34 | 0.1754    |
| 1336.68 | 1.3210    |
| 1359.75 | 2.9687    |
| 1423.91 | 17.4806   |
| 1425.29 | 18.3832   |
| 1437.44 | 27.7073   |
| 1442.42 | 11.0795   |
| 1448.44 | 20.5054   |
| 1463.95 | 8.9916    |
| 1485.60 | 28.6795   |
| 1814.94 | 534.8474  |
| 2554.27 | 2470.7766 |
| 2974.14 | 48.1671   |
| 2976.49 | 29.1568   |
| 2977.80 | 28.9441   |
| 3001.16 | 9.7804    |
| 3003.36 | 29.8995   |
| 3008.04 | 32.9557   |
| 3013.95 | 12.0949   |
| 3019.14 | 36.8226   |
| 3022.15 | 22.8700   |
| 3022.55 | 40.2025   |
| 3035.52 | 15.1417   |
| 3062.68 | 3.7718    |
| 3064.12 | 6.3292    |

ENTHALPY

|                             |     |                       |
|-----------------------------|-----|-----------------------|
| Total free energy           | ... | -904.98976722         |
| Thermal Enthalpy correction | ... | 0.00094421            |
| -----                       |     |                       |
| Total Enthalpy              |     | -904.98882301 Hartree |

**3-Methyl-1-azatricyclo[3.3.1.1<sup>3,7</sup>]decan-2-one, tetrafluoroboric acid salt (2)**

The IR spectrum

| wavenumber | T**2   |
|------------|--------|
| 24.00      | 0.5319 |
| 50.00      | 2.7561 |
| 59.03      | 3.1532 |
| 62.96      | 1.4060 |
| 90.19      | 9.9609 |
| 106.13     | 7.3633 |

|         |          |
|---------|----------|
| 173.85  | 41.6314  |
| 217.47  | 0.0847   |
| 241.86  | 0.3669   |
| 243.33  | 0.0645   |
| 302.24  | 14.3130  |
| 323.15  | 0.6826   |
| 331.30  | 0.3246   |
| 353.69  | 10.8605  |
| 363.10  | 0.3444   |
| 366.17  | 0.1846   |
| 388.99  | 0.1864   |
| 407.84  | 10.9952  |
| 431.59  | 6.1394   |
| 474.33  | 13.9515  |
| 483.30  | 9.3586   |
| 484.51  | 15.8671  |
| 503.01  | 43.2068  |
| 546.25  | 4.5460   |
| 596.81  | 70.1857  |
| 631.51  | 0.4816   |
| 652.50  | 78.7501  |
| 697.92  | 109.3251 |
| 764.71  | 0.0518   |
| 770.95  | 56.9508  |
| 795.40  | 13.9989  |
| 811.60  | 1.4890   |
| 818.18  | 174.4130 |
| 846.66  | 198.9887 |
| 872.59  | 0.7963   |
| 875.22  | 3.8677   |
| 894.99  | 0.2869   |
| 909.08  | 18.9782  |
| 944.53  | 29.7970  |
| 953.84  | 41.3665  |
| 967.13  | 30.0031  |
| 979.60  | 6.7007   |
| 1004.83 | 188.4060 |
| 1015.35 | 255.6368 |
| 1017.54 | 191.8456 |
| 1035.71 | 21.1821  |
| 1057.66 | 0.6251   |
| 1078.76 | 3.2813   |
| 1082.11 | 4.1024   |
| 1115.67 | 3.9696   |
| 1140.35 | 34.5157  |
| 1153.60 | 354.3791 |
| 1156.41 | 8.4312   |
| 1161.21 | 247.3631 |
| 1184.36 | 0.3079   |
| 1237.79 | 3.8358   |
| 1263.94 | 24.3090  |
| 1269.70 | 4.8259   |
| 1279.11 | 6.6051   |
| 1298.95 | 4.2705   |

|         |           |
|---------|-----------|
| 1299.96 | 4.7499    |
| 1320.41 | 0.0407    |
| 1326.33 | 2.8810    |
| 1329.59 | 0.8427    |
| 1336.47 | 0.4520    |
| 1359.98 | 13.5841   |
| 1362.73 | 1.8114    |
| 1420.68 | 0.2052    |
| 1424.31 | 25.1417   |
| 1427.06 | 22.5111   |
| 1429.91 | 2.1830    |
| 1439.10 | 42.4021   |
| 1443.50 | 5.9263    |
| 1446.67 | 29.4522   |
| 1461.33 | 15.4470   |
| 1486.68 | 25.2827   |
| 1807.14 | 486.3938  |
| 2558.27 | 2506.7281 |
| 2966.12 | 36.7675   |
| 2968.17 | 34.7011   |
| 2975.55 | 37.8134   |
| 2981.02 | 27.4621   |
| 2999.45 | 11.7015   |
| 3002.63 | 36.6588   |
| 3006.45 | 24.0886   |
| 3011.50 | 25.9297   |
| 3014.03 | 23.4014   |
| 3016.30 | 17.8595   |
| 3020.45 | 43.8064   |
| 3057.89 | 23.9475   |
| 3058.40 | 22.6025   |
| 3060.64 | 3.9266    |
| 3066.96 | 4.8093    |

ENTHALPY

|                             |     |                       |
|-----------------------------|-----|-----------------------|
| Total free energy           | ... | -944.23983925 Hartree |
| Thermal Enthalpy correction | ... | 0.00094421 Hartree    |
| -----                       |     |                       |
| Total Enthalpy              | ... | -944.23889504 Hartree |

**3,5,7-Trimethyl-methyl-1-azatricyclo[3.3.1.1<sup>3,7</sup>]decan-2-one, tetrafluoroboric acid salt (3)**

The IR spectrum

| wavenumber | T**2    |
|------------|---------|
| 44.12      | 3.0516  |
| 56.84      | 2.2884  |
| 58.22      | 1.7705  |
| 79.42      | 10.5130 |
| 103.13     | 6.4323  |
| 169.67     | 35.2049 |
| 211.93     | 0.0231  |
| 215.19     | 0.0185  |

|         |          |
|---------|----------|
| 219.09  | 0.0060   |
| 232.07  | 0.0481   |
| 232.82  | 0.0923   |
| 234.82  | 0.2629   |
| 246.10  | 0.8310   |
| 247.83  | 0.3465   |
| 295.38  | 0.0067   |
| 313.52  | 13.3234  |
| 331.02  | 0.5476   |
| 353.65  | 11.0609  |
| 367.54  | 0.3533   |
| 377.24  | 1.9006   |
| 396.27  | 0.4241   |
| 408.90  | 6.4080   |
| 425.40  | 20.5489  |
| 429.88  | 2.4600   |
| 479.27  | 1.3697   |
| 483.64  | 7.3856   |
| 490.52  | 27.2518  |
| 501.11  | 0.3389   |
| 502.95  | 41.6501  |
| 510.17  | 0.1830   |
| 556.64  | 3.7862   |
| 656.83  | 168.3334 |
| 682.35  | 61.0762  |
| 702.51  | 46.3468  |
| 758.89  | 0.2848   |
| 789.62  | 0.0243   |
| 819.01  | 79.9529  |
| 840.14  | 205.8352 |
| 845.70  | 9.0857   |
| 864.82  | 140.6876 |
| 872.60  | 7.7868   |
| 880.67  | 0.0835   |
| 890.44  | 1.1163   |
| 902.45  | 12.8871  |
| 916.23  | 12.1989  |
| 937.56  | 1.9920   |
| 956.31  | 1.1598   |
| 967.85  | 5.9333   |
| 989.58  | 153.3307 |
| 992.57  | 32.8969  |
| 1003.51 | 151.4540 |
| 1006.14 | 22.5526  |
| 1017.50 | 356.9940 |
| 1073.44 | 2.4207   |
| 1078.35 | 1.1616   |
| 1084.59 | 1.0961   |
| 1089.69 | 0.6897   |
| 1109.49 | 26.8744  |
| 1153.32 | 638.3387 |
| 1161.94 | 0.9239   |
| 1171.49 | 5.6027   |
| 1203.55 | 0.1948   |

|         |          |
|---------|----------|
| 1210.00 | 1.0453   |
| 1227.14 | 2.3984   |
| 1249.45 | 0.7625   |
| 1261.68 | 5.7938   |
| 1274.92 | 6.5926   |
| 1285.83 | 10.5572  |
| 1296.43 | 3.3464   |
| 1305.44 | 7.5884   |
| 1325.14 | 0.7798   |
| 1333.49 | 0.6034   |
| 1351.49 | 1.5933   |
| 1356.34 | 10.1289  |
| 1359.72 | 9.6630   |
| 1362.19 | 8.8298   |
| 1417.84 | 1.4076   |
| 1420.84 | 9.6330   |
| 1425.84 | 12.0704  |
| 1427.87 | 14.4186  |
| 1428.17 | 3.4193   |
| 1430.21 | 4.4489   |
| 1432.29 | 19.5768  |
| 1434.24 | 26.3777  |
| 1437.60 | 46.5177  |
| 1440.98 | 18.0292  |
| 1446.72 | 12.5709  |
| 1458.21 | 17.0089  |
| 1484.49 | 22.3953  |
| 1808.32 | 499.9433 |
| 2567.56 | 2577.278 |
| 2955.42 | 52.4881  |
| 2958.54 | 34.0129  |
| 2961.36 | 23.1612  |
| 2966.45 | 64.2689  |
| 2968.27 | 30.0424  |
| 2981.17 | 25.5622  |
| 2996.16 | 17.0713  |
| 3002.58 | 31.5193  |
| 3005.26 | 25.8265  |
| 3006.62 | 38.9290  |
| 3009.04 | 10.5064  |
| 3039.60 | 34.7740  |
| 3041.73 | 36.5647  |
| 3045.09 | 34.3021  |
| 3045.40 | 32.8964  |
| 3055.91 | 4.2644   |
| 3058.54 | 22.6291  |
| 3059.26 | 25.6405  |
| 3061.95 | 6.3801   |

ENTHALPY

|                             |     |                        |
|-----------------------------|-----|------------------------|
| Total free energy           | ... | -1022.73981113 Hartree |
| Thermal Enthalpy correction | ... | 0.00094421 Hartree     |

-----

|                |     |                        |
|----------------|-----|------------------------|
| Total Enthalpy | ... | -1022.73886692 Hartree |
|----------------|-----|------------------------|

---

(4)

The IR spectrum

| wavenumber | T**2     |
|------------|----------|
| 28.93      | 5.1471   |
| 34.40      | 0.8971   |
| 48.71      | 2.6739   |
| 60.12      | 6.5734   |
| 90.04      | 10.3652  |
| 101.86     | 9.0467   |
| 127.57     | 7.7925   |
| 152.94     | 15.4640  |
| 196.14     | 32.1641  |
| 260.78     | 13.9625  |
| 268.43     | 0.3525   |
| 317.24     | 31.0110  |
| 327.71     | 0.0960   |
| 348.66     | 8.3831   |
| 358.97     | 0.6240   |
| 364.24     | 4.6192   |
| 385.91     | 1.0942   |
| 413.13     | 5.2468   |
| 460.83     | 1.3601   |
| 483.64     | 2.3043   |
| 487.37     | 3.0179   |
| 496.18     | 1.6596   |
| 510.64     | 76.7758  |
| 533.16     | 27.4771  |
| 572.73     | 1.5900   |
| 639.41     | 7.0220   |
| 689.64     | 227.4305 |
| 714.47     | 36.0084  |
| 726.11     | 264.8600 |
| 742.84     | 75.8130  |
| 755.55     | 30.7167  |
| 780.29     | 26.0931  |
| 834.08     | 2.7403   |
| 848.89     | 237.1383 |
| 856.18     | 14.4783  |
| 876.88     | 89.0100  |
| 893.23     | 56.2294  |
| 905.04     | 1.7587   |
| 923.77     | 11.8861  |
| 940.36     | 20.8644  |
| 951.39     | 29.0726  |
| 976.78     | 425.9255 |
| 993.16     | 44.1868  |
| 1031.26    | 3.1352   |
| 1055.23    | 49.8487  |
| 1066.31    | 56.2668  |
| 1073.21    | 55.5398  |
| 1081.94    | 90.3565  |
| 1099.38    | 4.0129   |
| 1119.47    | 357.3056 |



|         |           |
|---------|-----------|
| 1125.90 | 13.4684   |
| 1151.44 | 227.7222  |
| 1167.39 | 325.6512  |
| 1178.92 | 27.6284   |
| 1211.13 | 8.3634    |
| 1232.16 | 17.8351   |
| 1265.21 | 4.6298    |
| 1268.93 | 4.2007    |
| 1293.87 | 13.8111   |
| 1298.95 | 9.6419    |
| 1306.69 | 3.4049    |
| 1309.15 | 11.6234   |
| 1323.17 | 14.9889   |
| 1331.42 | 0.4008    |
| 1345.14 | 0.9946    |
| 1348.43 | 10.8272   |
| 1352.69 | 6.2535    |
| 1372.43 | 0.9805    |
| 1397.69 | 10.1974   |
| 1418.28 | 20.2247   |
| 1426.91 | 10.4520   |
| 1433.11 | 16.2781   |
| 1440.02 | 29.6783   |
| 1450.39 | 9.9441    |
| 1463.26 | 50.3658   |
| 1690.14 | 154.8615  |
| 1737.55 | 549.5540  |
| 2946.66 | 1490.8693 |
| 2964.96 | 32.9808   |
| 2968.23 | 17.1185   |
| 2976.69 | 1.7862    |
| 2981.01 | 33.6431   |
| 2986.28 | 55.2180   |
| 2991.32 | 23.4267   |
| 3000.98 | 33.2095   |
| 3007.48 | 43.5819   |
| 3010.65 | 35.8820   |
| 3029.56 | 17.8648   |
| 3036.43 | 25.7682   |
| 3052.98 | 16.6330   |
| 3070.32 | 6.8973    |
| 3248.40 | 491.4892  |
| 3350.20 | 601.6440  |

ENTHALPY

|                             |     |                       |
|-----------------------------|-----|-----------------------|
| Total free energy           | ... | -981.37180406 Hartree |
| Thermal Enthalpy correction | ... | 0.00094421 Hartree    |
| -----                       |     |                       |
| Total Enthalpy              | ... | -981.37085985 Hartree |

(5)

The IR spectrum

| wavenumber | T**2   |
|------------|--------|
| 10.01      | 8.9302 |
| 37.64      | 5.6974 |

|         |          |
|---------|----------|
| 56.05   | 0.4306   |
| 70.18   | 1.1907   |
| 93.59   | 8.9227   |
| 104.67  | 6.8768   |
| 111.76  | 11.1831  |
| 124.47  | 0.5717   |
| 173.95  | 41.8483  |
| 223.55  | 0.7459   |
| 227.43  | 11.2356  |
| 254.76  | 0.9882   |
| 284.52  | 12.6098  |
| 289.03  | 9.4185   |
| 313.11  | 18.4573  |
| 332.29  | 1.2414   |
| 354.07  | 0.5456   |
| 364.39  | 3.2173   |
| 367.96  | 0.6288   |
| 393.37  | 0.1804   |
| 420.48  | 5.1883   |
| 461.59  | 9.1560   |
| 483.10  | 0.4349   |
| 486.90  | 7.1234   |
| 490.02  | 16.4142  |
| 504.13  | 29.2927  |
| 530.04  | 31.1721  |
| 553.58  | 5.3589   |
| 624.28  | 360.4729 |
| 643.59  | 55.0688  |
| 698.31  | 27.6467  |
| 711.84  | 83.0573  |
| 753.57  | 52.6365  |
| 762.51  | 9.8816   |
| 772.42  | 1.3319   |
| 778.49  | 94.4288  |
| 823.57  | 10.9616  |
| 840.75  | 59.3225  |
| 850.18  | 2.6251   |
| 872.56  | 164.1615 |
| 893.26  | 3.3955   |
| 906.71  | 9.8172   |
| 926.02  | 11.4410  |
| 943.77  | 33.0638  |
| 964.76  | 16.6498  |
| 982.15  | 230.3687 |
| 987.28  | 175.3674 |
| 999.26  | 70.7466  |
| 1037.04 | 34.7865  |
| 1038.98 | 7.2122   |
| 1059.07 | 11.8656  |
| 1074.18 | 59.1747  |
| 1088.19 | 62.5672  |
| 1103.33 | 153.5734 |
| 1116.05 | 6.6875   |
| 1141.63 | 66.8956  |

|         |           |
|---------|-----------|
| 1147.86 | 334.4443  |
| 1166.56 | 428.9627  |
| 1187.77 | 15.8262   |
| 1223.50 | 5.7043    |
| 1261.18 | 8.0377    |
| 1268.60 | 5.3956    |
| 1273.29 | 6.0357    |
| 1289.67 | 6.6666    |
| 1305.12 | 5.0139    |
| 1317.08 | 10.9589   |
| 1325.72 | 1.2756    |
| 1329.52 | 10.1153   |
| 1335.92 | 1.4838    |
| 1344.78 | 0.7024    |
| 1349.90 | 0.5045    |
| 1362.58 | 12.2242   |
| 1374.99 | 0.2897    |
| 1384.04 | 12.5492   |
| 1410.95 | 18.7416   |
| 1421.00 | 5.5702    |
| 1428.28 | 11.9827   |
| 1431.29 | 35.0427   |
| 1435.26 | 3.3784    |
| 1437.38 | 49.0274   |
| 1450.49 | 7.4777    |
| 1464.00 | 51.5115   |
| 1628.97 | 328.9582  |
| 1709.69 | 435.1735  |
| 2924.04 | 1277.8169 |
| 2962.81 | 35.4819   |
| 2965.38 | 14.9787   |
| 2968.94 | 3.2935    |
| 2970.91 | 60.3187   |
| 2980.80 | 50.4062   |
| 2983.80 | 32.0831   |
| 3003.87 | 33.2916   |
| 3006.18 | 47.9517   |
| 3010.97 | 35.2169   |
| 3031.42 | 21.2192   |
| 3038.65 | 23.3718   |
| 3047.96 | 30.8588   |
| 3053.18 | 29.8578   |
| 3059.75 | 10.8084   |
| 3070.74 | 4.9086    |
| 3330.76 | 206.6532  |
| 3469.39 | 344.9334  |

ENTHALPY

|                             |     |                        |
|-----------------------------|-----|------------------------|
| Total free energy           | ... | -1020.61768512 Hartree |
| Thermal Enthalpy correction | ... | 0.00094421 Hartree     |
| -----                       |     |                        |
| ---                         |     |                        |
| Total Enthalpy              | ... | -1020.61674092 Hartree |

(6)

The IR spectrum

| wavenumber | T**2     |
|------------|----------|
| 31.63      | 7.1310   |
| 39.37      | 0.6079   |
| 51.35      | 5.2530   |
| 54.87      | 2.0203   |
| 93.02      | 8.0660   |
| 157.32     | 51.5660  |
| 167.40     | 24.4807  |
| 188.02     | 136.2307 |
| 210.31     | 7.2921   |
| 254.63     | 6.2628   |
| 270.11     | 4.7966   |
| 276.04     | 2.3557   |
| 297.19     | 154.5789 |
| 305.17     | 27.2830  |
| 331.85     | 0.1605   |
| 346.65     | 35.8190  |
| 350.25     | 13.0124  |
| 366.88     | 0.7680   |
| 384.29     | 3.9050   |
| 418.16     | 11.4132  |
| 442.43     | 3.3939   |
| 449.80     | 3.0802   |
| 476.22     | 1.4040   |
| 483.06     | 10.2278  |
| 484.23     | 6.2469   |
| 501.91     | 39.4965  |
| 506.11     | 3.6081   |
| 517.45     | 19.9644  |
| 540.64     | 8.8291   |
| 627.53     | 71.9623  |
| 665.64     | 19.0511  |
| 686.00     | 5.7840   |
| 696.28     | 111.7790 |
| 772.37     | 35.0183  |
| 799.64     | 24.2516  |
| 809.89     | 2.3696   |
| 825.02     | 163.5718 |
| 848.35     | 226.8049 |
| 873.69     | 0.9713   |
| 877.09     | 9.2159   |
| 904.92     | 9.3400   |
| 906.12     | 2.6285   |
| 936.94     | 47.4435  |
| 942.53     | 91.2711  |
| 956.05     | 49.9595  |
| 974.55     | 29.3464  |
| 978.67     | 6.8129   |
| 1015.42    | 157.8625 |
| 1019.90    | 393.2318 |
| 1032.55    | 2.9869   |
| 1048.71    | 71.1739  |
| 1049.98    | 31.2182  |
| 1079.34    | 29.7566  |

|         |           |   |
|---------|-----------|---|
| 1083.93 | 3.4068    |   |
| 1091.00 | 230.7436  |   |
| 1123.64 | 3.4713    |   |
| 1143.36 | 86.4368   |   |
| 1147.56 | 92.8103   |   |
| 1156.74 | 456.9571  |   |
| 1171.68 | 35.2604   |   |
| 1199.79 | 67.7494   |   |
| 1240.54 | 27.9500   |   |
| 1251.81 | 4.1244    |   |
| 1256.22 | 81.6715   |   |
| 1275.60 | 3.5477    |   |
| 1280.33 | 76.2020   |   |
| 1300.25 | 14.1704   |   |
| 1300.81 | 11.0619   |   |
| 1322.78 | 8.2538    |   |
| 1325.28 | 9.5390    |   |
| 1327.45 | 1.7444    |   |
| 1328.98 | 2.3128    |   |
| 1347.65 | 8.3829    |   |
| 1360.16 | 11.0958   |   |
| 1379.40 | 23.2527   |   |
| 1421.39 | 6.8755    |   |
| 1426.28 | 15.2099   |   |
| 1429.19 | 25.4198   |   |
| 1434.77 | 16.6675   |   |
| 1441.49 | 20.3245   |   |
| 1442.99 | 63.3102   |   |
| 1449.09 | 44.3593   |   |
| 1462.48 | 18.1609   |   |
| 1507.08 | 71.1243   |   |
| 2795.25 | 1847.2438 | - |
| 2930.43 | 77.4465   |   |
| 2969.07 | 41.6193   |   |
| 2971.82 | 24.9212   |   |
| 2978.98 | 39.5321   |   |
| 2996.14 | 28.5478   |   |
| 2999.64 | 36.3067   |   |
| 3008.47 | 38.6409   |   |
| 3012.88 | 46.0690   |   |
| 3019.31 | 25.2829   |   |
| 3025.63 | 26.6425   |   |
| 3027.98 | 18.4585   |   |
| 3046.51 | 28.1542   |   |
| 3062.14 | 27.8881   |   |
| 3068.77 | 8.8855    |   |
| 3079.15 | 5.2711    |   |
| 3636.35 | 136.6395  |   |
| 3699.31 | 91.3798   |   |

ENTHALPY

|                             |     |                        |
|-----------------------------|-----|------------------------|
| Total free energy           | ... | -1020.61280582 Hartree |
| Thermal Enthalpy correction | ... | 0.00094421 Hartree     |

-----

|                |     |                        |
|----------------|-----|------------------------|
| Total Enthalpy | ... | -1020.61186161 Hartree |
|----------------|-----|------------------------|

---

(7)

The IR spectrum

| wavenumber | T**2     |
|------------|----------|
| 28.80      | 7.6246   |
| 38.87      | 1.8795   |
| 46.59      | 5.6594   |
| 53.90      | 1.2162   |
| 91.18      | 9.0133   |
| 137.62     | 13.8548  |
| 160.12     | 144.8175 |
| 163.34     | 55.6065  |
| 204.68     | 2.2836   |
| 217.45     | 0.6021   |
| 219.44     | 0.1402   |
| 231.22     | 1.2574   |
| 233.90     | 7.8340   |
| 246.83     | 1.7146   |
| 257.00     | 1.2893   |
| 260.93     | 10.3476  |
| 274.52     | 3.9629   |
| 298.71     | 160.5482 |
| 313.09     | 7.8209   |
| 331.18     | 1.5436   |
| 335.76     | 9.7228   |
| 347.30     | 37.6645  |
| 350.45     | 10.8018  |
| 399.33     | 0.5535   |
| 414.99     | 1.3533   |
| 422.25     | 6.9293   |
| 435.67     | 7.6684   |
| 458.98     | 1.7754   |
| 477.89     | 1.2069   |
| 481.23     | 7.7820   |
| 484.26     | 7.5693   |
| 488.07     | 1.6510   |
| 497.15     | 20.7649  |
| 502.43     | 31.1596  |
| 546.99     | 15.2069  |
| 560.05     | 5.2084   |
| 610.78     | 6.5740   |
| 657.97     | 105.8747 |
| 693.71     | 109.7595 |
| 704.81     | 3.1969   |
| 782.19     | 0.1777   |
| 819.00     | 71.1576  |
| 844.90     | 215.0655 |
| 849.23     | 41.2460  |
| 866.00     | 147.1856 |
| 874.46     | 0.2388   |
| 876.14     | 2.1843   |
| 894.48     | 1.1938   |
| 900.27     | 27.3938  |
| 914.13     | 11.7036  |

|         |           |
|---------|-----------|
| 935.02  | 41.6337   |
| 952.54  | 56.8761   |
| 958.64  | 5.4325    |
| 967.04  | 9.4250    |
| 984.74  | 29.7507   |
| 1000.99 | 19.8589   |
| 1019.82 | 451.3846  |
| 1027.58 | 54.1758   |
| 1031.92 | 84.0411   |
| 1072.82 | 143.3459  |
| 1078.98 | 15.4688   |
| 1082.28 | 5.7511    |
| 1087.24 | 18.4705   |
| 1096.11 | 159.0389  |
| 1097.52 | 17.3823   |
| 1152.32 | 616.0069  |
| 1172.78 | 51.4404   |
| 1197.81 | 82.1669   |
| 1203.63 | 0.4753    |
| 1213.42 | 5.2921    |
| 1230.50 | 4.2336    |
| 1247.58 | 0.5679    |
| 1256.11 | 54.0435   |
| 1260.96 | 61.8277   |
| 1272.25 | 18.2499   |
| 1280.81 | 55.7601   |
| 1295.49 | 20.1239   |
| 1304.27 | 9.1607    |
| 1314.35 | 9.2959    |
| 1335.20 | 1.6858    |
| 1342.97 | 10.4824   |
| 1353.14 | 4.4480    |
| 1354.86 | 15.1502   |
| 1357.80 | 10.2516   |
| 1377.84 | 24.8593   |
| 1419.77 | 2.8890    |
| 1422.22 | 3.1604    |
| 1426.50 | 4.6285    |
| 1427.86 | 11.2724   |
| 1428.50 | 14.9662   |
| 1431.37 | 18.3884   |
| 1433.49 | 36.8124   |
| 1435.89 | 8.6424    |
| 1440.78 | 36.7425   |
| 1442.23 | 42.0648   |
| 1450.58 | 40.0672   |
| 1460.75 | 19.1085   |
| 1506.50 | 66.1000   |
| 2789.00 | 1929.9345 |
| 2923.25 | 74.5013   |
| 2950.53 | 34.8148   |
| 2962.31 | 24.0461   |
| 2964.66 | 75.5930   |
| 2966.73 | 45.0917   |

|         |          |
|---------|----------|
| 2979.14 | 34.7241  |
| 2988.93 | 24.6164  |
| 2994.82 | 39.1307  |
| 3012.15 | 29.8691  |
| 3018.70 | 18.1135  |
| 3020.67 | 14.6039  |
| 3033.98 | 25.0204  |
| 3034.17 | 48.9334  |
| 3040.93 | 33.3666  |
| 3042.22 | 48.6676  |
| 3047.42 | 28.2884  |
| 3062.08 | 25.5561  |
| 3063.08 | 8.7439   |
| 3072.09 | 5.8976   |
| 3637.66 | 134.7973 |
| 3697.84 | 93.8715  |

ENTHALPY

|                             |     |                        |
|-----------------------------|-----|------------------------|
| Total free energy           | ... | -1099.11350361 Hartree |
| Thermal Enthalpy correction | ... | 0.00094421 Hartree     |
| -----                       |     |                        |
| Total Enthalpy              | ... | -1099.11255940 Hartree |

(7)

The IR spectrum

| wavenumber | T**2    |
|------------|---------|
| -212.40    | 0.0000  |
| 45.80      | 0.1682  |
| 50.67      | 4.9198  |
| 65.65      | 18.4385 |
| 80.93      | 2.8229  |
| 105.46     | 4.0329  |
| 111.27     | 16.5992 |
| 137.95     | 6.3223  |
| 157.82     | 13.8145 |
| 209.22     | 19.4885 |
| 224.60     | 6.6970  |
| 264.00     | 8.8213  |
| 307.88     | 22.5328 |
| 332.17     | 1.4027  |
| 333.92     | 2.2350  |
| 338.10     | 38.2098 |
| 351.70     | 10.3589 |
| 363.42     | 26.6938 |
| 375.41     | 3.2266  |
| 388.07     | 28.9695 |
| 444.74     | 12.7178 |
| 482.62     | 31.0705 |
| 488.88     | 8.2455  |
| 492.74     | 3.8600  |
| 498.39     | 21.4647 |
| 580.87     | 11.8027 |
| 616.12     | 90.5304 |
| 630.93     | 1.9421  |
| 658.74     | 90.5815 |
| 723.94     | 38.0237 |



|         |           |
|---------|-----------|
| 736.29  | 105.7208  |
| 751.60  | 3.8015    |
| 768.73  | 76.2347   |
| 806.87  | 202.4599  |
| 856.42  | 87.3094   |
| 866.80  | 10.1052   |
| 876.27  | 61.4033   |
| 878.59  | 93.1460   |
| 895.25  | 295.1592  |
| 896.70  | 136.5401  |
| 929.53  | 3.7936    |
| 953.93  | 7.3075    |
| 956.10  | 4.4208    |
| 985.56  | 302.7635  |
| 993.59  | 161.1446  |
| 1008.94 | 35.0573   |
| 1039.98 | 5.5404    |
| 1063.07 | 1.5981    |
| 1081.15 | 4.9071    |
| 1097.61 | 24.4077   |
| 1115.09 | 0.8986    |
| 1129.08 | 136.9640  |
| 1129.97 | 194.1764  |
| 1137.34 | 424.7952  |
| 1168.28 | 29.2685   |
| 1179.56 | 3.1119    |
| 1206.12 | 24.8900   |
| 1225.20 | 25.1802   |
| 1250.86 | 9.2873    |
| 1274.77 | 5.1734    |
| 1281.33 | 36.7486   |
| 1283.71 | 12.0655   |
| 1307.29 | 1.0722    |
| 1309.06 | 2.4186    |
| 1330.81 | 4.7287    |
| 1335.48 | 3.5338    |
| 1338.28 | 0.9488    |
| 1345.61 | 3.0484    |
| 1370.00 | 5.3462    |
| 1411.38 | 28.9767   |
| 1415.72 | 27.4967   |
| 1430.18 | 16.4472   |
| 1433.01 | 17.8983   |
| 1439.05 | 11.0823   |
| 1448.93 | 5.4740    |
| 1640.92 | 81.0709   |
| 2072.70 | 727.9208  |
| 2569.01 | 2643.0661 |
| 2887.91 | 50.3543   |
| 2890.88 | 102.8894  |
| 2942.57 | 27.9419   |
| 2958.03 | 45.8958   |
| 2976.47 | 33.6839   |
| 2981.09 | 30.2694   |

|         |          |
|---------|----------|
| 2996.18 | 27.9488  |
| 2998.31 | 52.9278  |
| 3001.07 | 48.3185  |
| 3004.49 | 47.8376  |
| 3046.47 | 2.3781   |
| 3054.74 | 12.9767  |
| 3064.41 | 3.0034   |
| 3271.32 | 965.3044 |
| 3430.14 | 18.8901  |

ENTHALPY

-----

|                             |     |               |         |
|-----------------------------|-----|---------------|---------|
| Total free energy           | ... | -981.30549134 | Hartree |
| Thermal Enthalpy correction | ... | 0.00094421    | Hartree |

-----

|                |     |               |         |
|----------------|-----|---------------|---------|
| Total Enthalpy | ... | -981.30454713 | Hartree |
|----------------|-----|---------------|---------|

---

(9)

The IR spectrum

| wavenumber | T**2     |
|------------|----------|
| -1537.58   | 0.0000   |
| 25.30      | 1.9383   |
| 37.93      | 2.7994   |
| 59.69      | 2.9061   |
| 63.69      | 1.9913   |
| 100.24     | 7.5708   |
| 123.03     | 10.3090  |
| 167.41     | 36.2381  |
| 194.10     | 0.7879   |
| 214.62     | 0.0504   |
| 217.04     | 0.0509   |
| 222.05     | 2.2955   |
| 230.22     | 1.7723   |
| 239.62     | 1.0882   |
| 246.75     | 1.5634   |
| 253.38     | 0.5996   |
| 255.63     | 0.5723   |
| 294.58     | 40.6491  |
| 302.38     | 22.0123  |
| 320.91     | 13.8993  |
| 332.24     | 0.2330   |
| 354.47     | 9.3864   |
| 387.35     | 113.0692 |
| 398.57     | 2.9750   |
| 400.93     | 36.5135  |
| 419.20     | 4.5863   |
| 427.36     | 10.0961  |
| 430.30     | 54.9749  |
| 455.31     | 15.4345  |
| 480.25     | 0.6780   |
| 484.16     | 8.7801   |
| 488.54     | 19.0115  |
| 501.17     | 16.7719  |
| 503.44     | 39.4598  |
| 524.14     | 101.7139 |

|         |          |
|---------|----------|
| 552.19  | 16.3252  |
| 624.16  | 51.5695  |
| 658.64  | 154.6808 |
| 700.99  | 201.5877 |
| 703.24  | 141.8170 |
| 782.82  | 1.2394   |
| 798.92  | 15.3237  |
| 816.50  | 145.5338 |
| 841.95  | 278.6144 |
| 849.81  | 5.3440   |
| 865.37  | 13.1362  |
| 871.03  | 104.9880 |
| 878.14  | 5.5964   |
| 891.23  | 58.1677  |
| 893.80  | 6.1938   |
| 907.45  | 2.6176   |
| 916.07  | 3.6804   |
| 941.45  | 2.5803   |
| 956.64  | 5.1928   |
| 968.73  | 2.6617   |
| 990.97  | 3.3145   |
| 1002.41 | 5.8870   |
| 1015.02 | 640.3249 |
| 1020.77 | 14.1887  |
| 1046.38 | 109.1950 |
| 1072.73 | 1.5617   |
| 1081.63 | 5.6122   |
| 1084.51 | 0.9538   |
| 1089.08 | 0.6647   |
| 1108.20 | 69.0373  |
| 1152.07 | 626.4588 |
| 1174.57 | 16.8236  |
| 1191.94 | 7.6539   |
| 1203.65 | 6.6092   |
| 1214.95 | 5.0598   |
| 1229.67 | 19.0890  |
| 1248.66 | 0.5585   |
| 1263.22 | 7.1908   |
| 1278.90 | 6.0390   |
| 1286.40 | 23.6911  |
| 1296.42 | 3.7245   |
| 1303.10 | 68.8357  |
| 1310.36 | 46.0797  |
| 1322.63 | 34.9916  |
| 1334.34 | 1.4440   |
| 1350.69 | 41.9366  |
| 1352.75 | 1.8333   |
| 1354.14 | 10.4004  |
| 1365.74 | 3.2180   |
| 1400.81 | 287.9389 |
| 1415.27 | 2.1535   |
| 1418.39 | 9.9239   |
| 1426.20 | 8.7390   |
| 1427.26 | 4.2997   |

|         |           |
|---------|-----------|
| 1428.99 | 10.8790   |
| 1432.03 | 7.3716    |
| 1434.69 | 19.3236   |
| 1437.11 | 73.3494   |
| 1437.94 | 51.2728   |
| 1440.12 | 19.3506   |
| 1451.19 | 10.8936   |
| 1456.11 | 23.3298   |
| 1511.39 | 158.7743  |
| 1946.46 | 125.8178  |
| 2618.12 | 2337.9443 |
| 2951.03 | 62.6769   |
| 2953.70 | 27.7305   |
| 2961.71 | 33.9773   |
| 2965.00 | 37.3642   |
| 2966.27 | 68.8813   |
| 2968.93 | 32.0081   |
| 2994.81 | 39.6876   |
| 2998.20 | 43.9472   |
| 3015.12 | 20.0031   |
| 3015.56 | 15.6115   |
| 3023.75 | 7.3783    |
| 3028.37 | 33.0472   |
| 3036.93 | 30.9107   |
| 3038.27 | 40.1940   |
| 3042.38 | 40.2918   |
| 3043.48 | 38.0603   |
| 3066.50 | 14.4352   |
| 3071.92 | 2.7015    |
| 3073.59 | 5.8855    |
| 3653.75 | 144.2072  |

#### ENTHALPY

-----

The enthalpy is  $H = U + kB*T$

$kB$  is Boltzmann's constant

|                             |     |                |         |
|-----------------------------|-----|----------------|---------|
| Total free energy           | ... | -1099.06183518 | Hartree |
| Thermal Enthalpy correction | ... | 0.00094421     | Hartree |

-----

|                |     |                |         |
|----------------|-----|----------------|---------|
| Total Enthalpy | ... | -1099.06089098 | Hartree |
|----------------|-----|----------------|---------|

---

## H<sub>2</sub>O

The IR spectrum

| wavenumber | T**2     |
|------------|----------|
| 1554.48    | 109.7273 |
| 3709.34    | 19.8719  |
| 3796.13    | 110.8861 |

#### ENTHALPY

-----

|                             |     |              |         |
|-----------------------------|-----|--------------|---------|
| Total free energy           | ... | -76.36806255 | Hartree |
| Thermal Enthalpy correction | ... | 0.00094421   | Hartree |

-----

|                |     |              |         |
|----------------|-----|--------------|---------|
| Total Enthalpy | ... | -76.36711835 | Hartree |
|----------------|-----|--------------|---------|

---

Cartesian coordinates of all optimized geometries of the amides, products of hydrolyses, transition states using DFT-D3(BJ) methods with different density functional.

**1-Azatricyclo[3.3.1.1<sup>3,7</sup>]decan-2-one, tetrafluoroboric acid salt (1)**

**PBE**

|   |           |           |           |
|---|-----------|-----------|-----------|
| C | -2.508710 | -0.195659 | -1.495081 |
| C | -1.615727 | -1.337282 | -0.988680 |
| C | -0.179485 | -0.836762 | -0.877360 |
| C | -2.446761 | 0.985076  | -0.495203 |
| C | -1.018879 | 1.442250  | -0.367329 |
| C | -2.099769 | -1.815396 | 0.390428  |
| C | -2.927618 | 0.507164  | 0.898973  |
| C | -2.028460 | -0.640878 | 1.380710  |
| C | -0.589266 | -0.141083 | 1.475877  |
| H | -2.187650 | 0.135410  | -2.493494 |
| H | -3.554964 | -0.525585 | -1.578940 |
| H | -1.629770 | -2.169911 | -1.706692 |
| H | 0.219821  | -0.455939 | -1.825891 |
| H | -3.036679 | 1.840139  | -0.847664 |
| H | 0.525051  | -1.587761 | -0.500310 |
| H | -3.133081 | -2.186483 | 0.321024  |
| H | 0.900686  | 0.644283  | 0.187291  |
| H | -3.972067 | 0.172760  | 0.810548  |
| H | -1.474385 | -2.648385 | 0.743853  |
| H | -2.910101 | 1.343405  | 1.613322  |
| H | 0.129161  | -0.907437 | 1.792306  |
| H | -2.343428 | -0.967563 | 2.382399  |
| H | -0.489719 | 0.723412  | 2.146364  |
| B | 3.036821  | -0.244400 | 0.166613  |
| N | -0.129412 | 0.310941  | 0.108675  |
| O | -0.549378 | 2.524934  | -0.569229 |
| F | 2.904401  | -0.730570 | -1.142127 |
| F | 2.326267  | 1.064865  | 0.207754  |
| F | 4.336233  | -0.065996 | 0.566551  |
| F | 2.303408  | -1.089088 | 1.056102  |

**PBE0**

|   |           |           |           |
|---|-----------|-----------|-----------|
| C | -2.495359 | -0.193070 | -1.484523 |
| C | -1.607646 | -1.327798 | -0.981937 |
| C | -0.181120 | -0.826918 | -0.865334 |
| C | -2.435204 | 0.975838  | -0.488353 |
| C | -1.011578 | 1.422230  | -0.357901 |
| C | -2.090602 | -1.805720 | 0.386519  |
| C | -2.916284 | 0.500548  | 0.893056  |
| C | -2.022837 | -0.640395 | 1.372395  |
| C | -0.592276 | -0.142151 | 1.468054  |
| H | -2.173929 | 0.137702  | -2.475195 |
| H | -3.533465 | -0.523280 | -1.571713 |

|   |           |           |           |
|---|-----------|-----------|-----------|
| H | -1.616488 | -2.153316 | -1.696646 |
| H | 0.217224  | -0.448517 | -1.806907 |
| H | -3.014103 | 1.829598  | -0.838658 |
| H | 0.516562  | -1.574440 | -0.490939 |
| H | -3.116563 | -2.175539 | 0.315018  |
| H | 0.873606  | 0.639407  | 0.187355  |
| H | -3.953222 | 0.166998  | 0.805031  |
| H | -1.468750 | -2.633110 | 0.737339  |
| H | -2.900322 | 1.329872  | 1.604790  |
| H | 0.119012  | -0.904895 | 1.782310  |
| H | -2.334893 | -0.966183 | 2.366970  |
| H | -0.495752 | 0.713825  | 2.138137  |
| B | 3.007115  | -0.236011 | 0.158471  |
| N | -0.137166 | 0.309266  | 0.114442  |
| O | -0.545891 | 2.492035  | -0.562344 |
| F | 2.875667  | -0.751263 | -1.124424 |
| F | 2.320412  | 1.053296  | 0.169367  |
| F | 4.297049  | -0.071393 | 0.551955  |
| F | 2.273344  | -1.048152 | 1.054456  |

### PBE0 methanol

|   |           |           |           |
|---|-----------|-----------|-----------|
| C | -2.654353 | -0.176681 | -1.440226 |
| C | -1.797889 | -1.356118 | -0.991174 |
| C | -0.342497 | -0.931863 | -0.983963 |
| C | -2.469997 | 0.994372  | -0.458243 |
| C | -1.028984 | 1.362668  | -0.439586 |
| C | -2.205651 | -1.802310 | 0.410991  |
| C | -2.868598 | 0.548787  | 0.960516  |
| C | -2.008943 | -0.639020 | 1.380240  |
| C | -0.552538 | -0.217997 | 1.377084  |
| H | -2.385896 | 0.132980  | -2.452475 |
| H | -3.711174 | -0.450065 | -1.446731 |
| H | -1.898278 | -2.179955 | -1.699469 |
| H | -0.010582 | -0.573388 | -1.958123 |
| H | -3.033836 | 1.870765  | -0.773379 |
| H | 0.330205  | -1.719939 | -0.648459 |
| H | -3.252347 | -2.113397 | 0.411914  |
| H | 0.814078  | 0.515233  | -0.024649 |
| H | -3.924323 | 0.271611  | 0.944303  |
| H | -1.606263 | -2.660850 | 0.724156  |
| H | -2.753972 | 1.377040  | 1.662987  |
| H | 0.126540  | -1.026188 | 1.644860  |
| H | -2.263090 | -0.941307 | 2.397360  |
| H | -0.366126 | 0.633134  | 2.031493  |
| B | 3.298419  | -0.084105 | 0.293943  |
| N | -0.174570 | 0.206092  | -0.015281 |
| O | -0.496317 | 2.392497  | -0.699657 |
| F | 4.140649  | -0.438245 | -0.751835 |
| F | 2.448541  | 0.979545  | -0.135149 |
| F | 4.029686  | 0.339451  | 1.396125  |
| F | 2.474646  | -1.164282 | 0.643219  |

### TPSS

|   |           |           |           |
|---|-----------|-----------|-----------|
| C | -2.508210 | -0.198673 | -1.495574 |
| C | -1.616325 | -1.342659 | -0.987768 |
| C | -0.176383 | -0.848640 | -0.881605 |
| C | -2.441978 | 0.986350  | -0.497336 |
| C | -1.013768 | 1.442428  | -0.374207 |
| C | -2.099916 | -1.818644 | 0.393702  |
| C | -2.923271 | 0.509994  | 0.899644  |
| C | -2.026454 | -0.641366 | 1.382635  |
| C | -0.585176 | -0.146498 | 1.480575  |
| H | -2.187588 | 0.128941  | -2.489955 |
| H | -3.550843 | -0.525378 | -1.573439 |
| H | -1.635001 | -2.172562 | -1.701398 |
| H | 0.219621  | -0.468497 | -1.825085 |
| H | -3.030126 | 1.836230  | -0.849218 |
| H | 0.520086  | -1.593411 | -0.494464 |
| H | -3.129943 | -2.185399 | 0.325843  |
| H | 0.892145  | 0.639934  | 0.186018  |
| H | -3.963403 | 0.178514  | 0.811138  |
| H | -1.475099 | -2.646289 | 0.746094  |
| H | -2.899535 | 1.343650  | 1.609469  |
| H | 0.127705  | -0.914330 | 1.784844  |
| H | -2.341400 | -0.964391 | 2.380189  |
| H | -0.481915 | 0.715623  | 2.144492  |
| B | 3.023605  | -0.225167 | 0.167597  |
| N | -0.125824 | 0.309683  | 0.105693  |
| O | -0.540522 | 2.520545  | -0.583171 |
| F | 2.884523  | -0.680466 | -1.149390 |
| F | 2.344907  | 1.083518  | 0.239482  |
| F | 4.324459  | -0.094337 | 0.574565  |
| F | 2.272171  | -1.080240 | 1.031419  |

## TPSSH

|   |           |           |           |
|---|-----------|-----------|-----------|
| C | -2.533636 | -0.216693 | -1.486307 |
| C | -1.602053 | -1.328539 | -0.990851 |
| C | -0.176210 | -0.798204 | -0.920774 |
| C | -2.475405 | 0.974587  | -0.501822 |
| C | -1.056927 | 1.458102  | -0.421862 |
| C | -2.040276 | -1.804360 | 0.401060  |
| C | -2.911715 | 0.500197  | 0.904347  |
| C | -1.976997 | -0.620222 | 1.375574  |
| C | -0.551126 | -0.088221 | 1.436945  |
| H | -2.245842 | 0.109652  | -2.488664 |
| H | -3.566168 | -0.571434 | -1.537387 |
| H | -1.612596 | -2.162879 | -1.695557 |
| H | 0.186967  | -0.418108 | -1.874744 |
| H | -3.087767 | 1.806514  | -0.847512 |
| H | 0.543361  | -1.522147 | -0.544258 |
| H | -3.058868 | -2.198879 | 0.359145  |
| H | 0.858587  | 0.731523  | 0.126638  |
| H | -3.942256 | 0.141693  | 0.842765  |
| H | -1.386484 | -2.609523 | 0.745202  |
| H | -2.894714 | 1.338118  | 1.605827  |

|   |           |           |           |
|---|-----------|-----------|-----------|
| H | 0.187359  | -0.832447 | 1.730863  |
| H | -2.259551 | -0.941389 | 2.380592  |
| H | -0.456508 | 0.780977  | 2.088931  |
| B | 2.982375  | -0.320647 | 0.252558  |
| N | -0.137181 | 0.365192  | 0.052315  |
| O | -0.610707 | 2.534438  | -0.671240 |
| F | 2.813653  | -0.578470 | -1.111375 |
| F | 2.336084  | 0.966589  | 0.515962  |
| F | 4.289357  | -0.267374 | 0.641910  |
| F | 2.241786  | -1.279582 | 0.992508  |

### 3-Methyl-1-azatricyclo[3.3.1.1<sup>3,7</sup>]decan-2-one, tetrafluoroboric acid salt (2)

#### PBE

|   |           |           |           |
|---|-----------|-----------|-----------|
| C | -2.501668 | -0.187797 | -1.490175 |
| C | -1.616586 | -1.334077 | -0.985697 |
| C | -0.178982 | -0.840972 | -0.875038 |
| C | -2.457649 | 1.015256  | -0.507301 |
| C | -1.011779 | 1.443132  | -0.369599 |
| C | -2.103009 | -1.810683 | 0.392012  |
| C | -2.916989 | 0.516240  | 0.893145  |
| C | -2.026979 | -0.634844 | 1.378904  |
| C | -0.586780 | -0.141979 | 1.475731  |
| H | -2.180717 | 0.140976  | -2.490344 |
| H | -3.550371 | -0.512315 | -1.574863 |
| H | -1.637036 | -2.165134 | -1.705560 |
| H | 0.222112  | -0.462457 | -1.823751 |
| H | 0.523385  | -1.592898 | -0.495815 |
| H | -3.138007 | -2.177028 | 0.322223  |
| H | 0.899637  | 0.640740  | 0.185258  |
| H | -3.964176 | 0.188043  | 0.803972  |
| H | -1.481169 | -2.645817 | 0.746503  |
| H | -2.898289 | 1.353895  | 1.607193  |
| H | 0.129804  | -0.910186 | 1.791780  |
| H | -2.347507 | -0.956475 | 2.380594  |
| H | -0.484087 | 0.722795  | 2.145428  |
| B | 3.038578  | -0.246894 | 0.164312  |
| N | -0.130142 | 0.307317  | 0.108162  |
| O | -0.525263 | 2.519291  | -0.569545 |
| F | 2.905086  | -0.736928 | -1.142979 |
| F | 2.327497  | 1.061620  | 0.202914  |
| F | 4.338896  | -0.066363 | 0.561569  |
| F | 2.307917  | -1.089926 | 1.057336  |
| C | -3.313165 | 2.176363  | -0.998172 |
| H | -2.973761 | 2.530805  | -1.979788 |
| H | -4.358693 | 1.852022  | -1.086972 |
| H | -3.268189 | 3.023858  | -0.302473 |

#### PBE0

|   |           |           |           |
|---|-----------|-----------|-----------|
| C | -2.491425 | -0.185727 | -1.480294 |
| C | -1.610504 | -1.324343 | -0.979433 |



|   |           |           |           |
|---|-----------|-----------|-----------|
| C | -0.183056 | -0.829379 | -0.863985 |
| C | -2.448979 | 1.004701  | -0.501250 |
| C | -1.008990 | 1.424655  | -0.361208 |
| C | -2.095068 | -1.800608 | 0.388045  |
| C | -2.909298 | 0.509454  | 0.885854  |
| C | -2.023636 | -0.633337 | 1.369980  |
| C | -0.592545 | -0.140436 | 1.466908  |
| H | -2.170209 | 0.142498  | -2.472850 |
| H | -3.531734 | -0.511324 | -1.568241 |
| H | -1.624956 | -2.148657 | -1.695567 |
| H | 0.216352  | -0.453265 | -1.806003 |
| H | 0.513186  | -1.577029 | -0.487212 |
| H | -3.122364 | -2.166674 | 0.316580  |
| H | 0.869628  | 0.638456  | 0.183612  |
| H | -3.948441 | 0.180492  | 0.796979  |
| H | -1.475897 | -2.629391 | 0.740209  |
| H | -2.893357 | 1.340385  | 1.597084  |
| H | 0.117605  | -0.904196 | 1.781195  |
| H | -2.340643 | -0.953843 | 2.364812  |
| H | -0.493822 | 0.716388  | 2.135570  |
| B | 3.006454  | -0.235467 | 0.154491  |
| N | -0.140785 | 0.307971  | 0.112550  |
| O | -0.528481 | 2.489026  | -0.562628 |
| F | 2.875289  | -0.754580 | -1.126872 |
| F | 2.318300  | 1.052751  | 0.162254  |
| F | 4.296781  | -0.067918 | 0.546524  |
| F | 2.275047  | -1.046151 | 1.053496  |
| C | -3.290443 | 2.164656  | -0.989718 |
| H | -2.950247 | 2.514492  | -1.964829 |
| H | -4.331425 | 1.849449  | -1.078443 |
| H | -3.240415 | 3.006533  | -0.298644 |

### PBE0 Methanol

|   |           |           |           |
|---|-----------|-----------|-----------|
| C | -2.643803 | -0.188137 | -1.451070 |
| C | -1.793826 | -1.366118 | -0.991181 |
| C | -0.338545 | -0.945513 | -0.982372 |
| C | -2.481921 | 1.011883  | -0.492260 |
| C | -1.025696 | 1.355998  | -0.462101 |
| C | -2.208194 | -1.801369 | 0.411525  |
| C | -2.866347 | 0.555460  | 0.932622  |
| C | -2.013628 | -0.629308 | 1.369170  |
| C | -0.557522 | -0.211280 | 1.370214  |
| H | -2.372322 | 0.111818  | -2.466380 |
| H | -3.701931 | -0.459656 | -1.460029 |
| H | -1.896020 | -2.193395 | -1.695258 |
| H | -0.002291 | -0.595661 | -1.958172 |
| H | 0.332547  | -1.730513 | -0.636640 |
| H | -3.255368 | -2.110791 | 0.410600  |
| H | 0.810145  | 0.511769  | -0.033085 |
| H | -3.923373 | 0.280158  | 0.914131  |
| H | -1.611067 | -2.657695 | 0.734604  |
| H | -2.755577 | 1.390139  | 1.629459  |
| H | 0.120225  | -1.017530 | 1.647005  |

|   |           |           |           |
|---|-----------|-----------|-----------|
| H | -2.276494 | -0.918962 | 2.387791  |
| H | -0.372964 | 0.645441  | 2.017829  |
| B | 3.296725  | -0.077298 | 0.299055  |
| N | -0.177870 | 0.200343  | -0.023963 |
| O | -0.480957 | 2.378473  | -0.726476 |
| F | 4.142538  | -0.439323 | -0.741196 |
| F | 2.444200  | 0.978736  | -0.143022 |
| F | 4.024122  | 0.360346  | 1.398337  |
| F | 2.476055  | -1.156709 | 0.657773  |
| C | -3.301760 | 2.203106  | -0.940407 |
| H | -3.015122 | 2.523195  | -1.942962 |
| H | -4.356703 | 1.925789  | -0.954602 |
| H | -3.175333 | 3.046187  | -0.259975 |

### TPSS

|   |           |           |           |
|---|-----------|-----------|-----------|
| C | -2.502535 | -0.191716 | -1.489910 |
| C | -1.618335 | -1.340470 | -0.984289 |
| C | -0.176811 | -0.853976 | -0.879095 |
| C | -2.452421 | 1.014277  | -0.508191 |
| C | -1.007856 | 1.441746  | -0.375887 |
| C | -2.103654 | -1.814893 | 0.396083  |
| C | -2.913861 | 0.517985  | 0.894060  |
| C | -2.025720 | -0.636139 | 1.381435  |
| C | -0.583463 | -0.147759 | 1.480774  |
| H | -2.182374 | 0.133043  | -2.486257 |
| H | -3.547664 | -0.512999 | -1.567668 |
| H | -1.643544 | -2.168796 | -1.699712 |
| H | 0.220605  | -0.475986 | -1.822888 |
| H | 0.517527  | -1.599792 | -0.490213 |
| H | -3.135334 | -2.177185 | 0.328177  |
| H | 0.890439  | 0.635985  | 0.184233  |
| H | -3.956333 | 0.191764  | 0.804441  |
| H | -1.482145 | -2.644590 | 0.749488  |
| H | -2.889312 | 1.352539  | 1.604082  |
| H | 0.127581  | -0.917019 | 1.785678  |
| H | -2.345770 | -0.953872 | 2.379210  |
| H | -0.477408 | 0.715386  | 2.143013  |
| B | 3.024544  | -0.224139 | 0.163756  |
| N | -0.126768 | 0.304847  | 0.105318  |
| O | -0.518822 | 2.513825  | -0.583030 |
| F | 2.884696  | -0.677674 | -1.153711 |
| F | 2.344574  | 1.082905  | 0.238788  |
| F | 4.326238  | -0.092501 | 0.569127  |
| F | 2.276068  | -1.081979 | 1.027506  |
| C | -3.307260 | 2.179874  | -1.001274 |
| H | -2.966560 | 2.527636  | -1.979846 |
| H | -4.348846 | 1.856496  | -1.086992 |
| H | -3.257557 | 3.022758  | -0.307239 |

### TPSSH

|   |           |           |           |
|---|-----------|-----------|-----------|
| C | -2.519062 | -0.197504 | -1.484428 |
|---|-----------|-----------|-----------|

|   |           |           |           |
|---|-----------|-----------|-----------|
| C | -1.601273 | -1.319110 | -0.990142 |
| C | -0.171508 | -0.802850 | -0.917693 |
| C | -2.473696 | 1.012902  | -0.515077 |
| C | -1.036561 | 1.461875  | -0.422961 |
| C | -2.046639 | -1.792648 | 0.399290  |
| C | -2.894762 | 0.520167  | 0.894796  |
| C | -1.974975 | -0.608185 | 1.371423  |
| C | -0.545426 | -0.089793 | 1.437380  |
| H | -2.228108 | 0.125432  | -2.487854 |
| H | -3.555788 | -0.541763 | -1.537977 |
| H | -1.620782 | -2.151390 | -1.697275 |
| H | 0.196786  | -0.425871 | -1.870922 |
| H | 0.542005  | -1.531439 | -0.538602 |
| H | -3.068777 | -2.177631 | 0.354822  |
| H | 0.867063  | 0.722870  | 0.128529  |
| H | -3.929381 | 0.171936  | 0.829889  |
| H | -1.400850 | -2.603498 | 0.745135  |
| H | -2.874474 | 1.358321  | 1.597176  |
| H | 0.187113  | -0.839605 | 1.731983  |
| H | -2.266408 | -0.923811 | 2.375793  |
| H | -0.444982 | 0.778721  | 2.089418  |
| B | 2.989037  | -0.331674 | 0.254291  |
| N | -0.129616 | 0.359974  | 0.053728  |
| O | -0.569014 | 2.530591  | -0.668982 |
| F | 2.817695  | -0.586888 | -1.110018 |
| F | 2.346020  | 0.956127  | 0.520744  |
| F | 4.297189  | -0.281624 | 0.641024  |
| F | 2.248315  | -1.290462 | 0.993883  |
| C | -3.355860 | 2.156082  | -0.998718 |
| H | -3.044043 | 2.499632  | -1.985761 |
| H | -4.391379 | 1.815744  | -1.058246 |
| H | -3.305940 | 3.004954  | -0.315679 |

**3,5,7-Trimethyl-methyl-1-azatricyclo[3.3.1.1<sup>3,7</sup>]decan-2-one, tetrafluoroboric acid salt  
(3)**

|   |           |           |           |
|---|-----------|-----------|-----------|
| C | -2.528094 | -0.180593 | -1.486210 |
| C | -1.644485 | -1.346410 | -1.014312 |
| C | -0.210981 | -0.833255 | -0.886138 |
| C | -2.484239 | 1.011481  | -0.494808 |
| C | -1.039730 | 1.441492  | -0.361157 |
| C | -2.122486 | -1.807737 | 0.374326  |
| C | -2.936642 | 0.500510  | 0.899529  |
| C | -2.056050 | -0.658102 | 1.396018  |
| C | -0.612886 | -0.157023 | 1.469268  |
| H | -2.210212 | 0.155452  | -2.485878 |
| H | -3.576464 | -0.508756 | -1.572315 |
| H | 0.185506  | -0.444692 | -1.833653 |
| H | 0.493606  | -1.589867 | -0.519069 |
| H | -3.158421 | -2.177329 | 0.304540  |
| H | 0.870226  | 0.630922  | 0.185880  |
| H | -3.984114 | 0.169723  | 0.813206  |
| H | -1.500349 | -2.648599 | 0.720020  |

|   |           |           |           |
|---|-----------|-----------|-----------|
| H | -2.917633 | 1.330353  | 1.624033  |
| H | 0.104073  | -0.927613 | 1.780578  |
| H | -0.511679 | 0.702695  | 2.146969  |
| B | 3.010291  | -0.255962 | 0.136540  |
| N | -0.159725 | 0.301826  | 0.107828  |
| O | -0.552882 | 2.517638  | -0.559907 |
| F | 2.876941  | -0.712841 | -1.182783 |
| F | 2.302135  | 1.050666  | 0.208791  |
| F | 4.311496  | -0.089425 | 0.538989  |
| F | 2.278947  | -1.121881 | 1.007898  |
| C | -3.344608 | 2.174805  | -0.973483 |
| H | -3.008855 | 2.538472  | -1.952927 |
| H | -4.389352 | 1.847922  | -1.062008 |
| H | -3.300309 | 3.016500  | -0.270730 |
| C | -2.500498 | -1.125137 | 2.781175  |
| H | -3.538525 | -1.484431 | 2.750025  |
| H | -1.867697 | -1.948220 | 3.141180  |
| H | -2.446627 | -0.307550 | 3.514388  |
| C | -1.678303 | -2.496683 | -2.019073 |
| H | -1.032816 | -3.323741 | -1.692544 |
| H | -2.701146 | -2.884415 | -2.125095 |
| H | -1.333796 | -2.168784 | -3.010122 |

## PBE0

|   |           |           |           |
|---|-----------|-----------|-----------|
| C | -2.520785 | -0.181157 | -1.475904 |
| C | -1.641902 | -1.338793 | -1.006859 |
| C | -0.218148 | -0.826270 | -0.876507 |
| C | -2.476810 | 0.998942  | -0.489259 |
| C | -1.038760 | 1.421220  | -0.350830 |
| C | -2.117500 | -1.799233 | 0.371531  |
| C | -2.929293 | 0.493120  | 0.893387  |
| C | -2.052942 | -0.657188 | 1.386436  |
| C | -0.618708 | -0.157806 | 1.459064  |
| H | -2.203658 | 0.153332  | -2.468474 |
| H | -3.561215 | -0.508918 | -1.564084 |
| H | 0.176584  | -0.441621 | -1.817919 |
| H | 0.479788  | -1.579130 | -0.511904 |
| H | -3.146078 | -2.167398 | 0.301201  |
| H | 0.839583  | 0.626120  | 0.180279  |
| H | -3.969305 | 0.163329  | 0.808411  |
| H | -1.498885 | -2.634261 | 0.714872  |
| H | -2.911219 | 1.317056  | 1.613797  |
| H | 0.091461  | -0.924223 | 1.768655  |
| H | -0.519606 | 0.694312  | 2.134833  |
| B | 2.977122  | -0.247436 | 0.128983  |
| N | -0.171623 | 0.298673  | 0.109303  |
| O | -0.558415 | 2.487492  | -0.541966 |
| F | 2.845361  | -0.744416 | -1.160782 |
| F | 2.290054  | 1.040311  | 0.159810  |
| F | 4.268287  | -0.087879 | 0.523323  |
| F | 2.246992  | -1.073948 | 1.015080  |
| C | -3.323332 | 2.161273  | -0.965158 |

|   |           |           |           |
|---|-----------|-----------|-----------|
| H | -2.984768 | 2.522431  | -1.936674 |
| H | -4.363088 | 1.842936  | -1.056785 |
| H | -3.276293 | 2.995842  | -0.265084 |
| C | -2.492350 | -1.121863 | 2.763293  |
| H | -3.522999 | -1.480891 | 2.733387  |
| H | -1.861640 | -1.938203 | 3.120991  |
| H | -2.439982 | -0.309158 | 3.491481  |
| C | -1.670774 | -2.481157 | -2.006178 |
| H | -1.030005 | -3.302692 | -1.679956 |
| H | -2.686423 | -2.866880 | -2.115450 |
| H | -1.325109 | -2.154461 | -2.989375 |

### PBE0 Methanol

|   |           |           |           |
|---|-----------|-----------|-----------|
| C | -2.638709 | -0.189941 | -1.471185 |
| C | -1.785788 | -1.381358 | -1.040732 |
| C | -0.335797 | -0.929089 | -0.999234 |
| C | -2.497130 | 0.995149  | -0.495540 |
| C | -1.046453 | 1.356032  | -0.451998 |
| C | -2.200482 | -1.814627 | 0.365068  |
| C | -2.884002 | 0.515246  | 0.917598  |
| C | -2.032059 | -0.670735 | 1.364537  |
| C | -0.577292 | -0.232149 | 1.358220  |
| H | -2.363276 | 0.126656  | -2.481171 |
| H | -3.693911 | -0.474463 | -1.493426 |
| H | 0.003494  | -0.562412 | -1.968520 |
| H | 0.339821  | -1.714920 | -0.662456 |
| H | -3.246117 | -2.134861 | 0.352809  |
| H | 0.793282  | 0.519330  | -0.019291 |
| H | -3.938527 | 0.228556  | 0.891193  |
| H | -1.599953 | -2.673502 | 0.680428  |
| H | -2.786379 | 1.340399  | 1.628785  |
| H | 0.105896  | -1.035830 | 1.631301  |
| H | -0.406548 | 0.617465  | 2.020022  |
| B | 3.275019  | -0.039795 | 0.361120  |
| N | -0.193094 | 0.200399  | -0.024415 |
| O | -0.509102 | 2.386426  | -0.698037 |
| F | 4.151028  | -0.347830 | -0.671129 |
| F | 2.414877  | 1.019103  | -0.061287 |
| F | 3.968235  | 0.366815  | 1.493511  |
| F | 2.463462  | -1.144718 | 0.657702  |
| C | -3.329542 | 2.182724  | -0.931629 |
| H | -3.040789 | 2.520404  | -1.927714 |
| H | -4.380755 | 1.892506  | -0.956176 |
| H | -3.217488 | 3.017208  | -0.238290 |
| C | -2.410129 | -1.108071 | 2.768437  |
| H | -3.455050 | -1.422772 | 2.792762  |
| H | -1.793743 | -1.948919 | 3.093489  |
| H | -2.282864 | -0.291272 | 3.482434  |
| C | -1.917957 | -2.525516 | -2.029956 |
| H | -1.298550 | -3.373237 | -1.729497 |

|   |           |           |           |
|---|-----------|-----------|-----------|
| H | -2.955470 | -2.861558 | -2.076332 |
| H | -1.614544 | -2.215436 | -3.032434 |

### TPSS

|   |           |           |           |
|---|-----------|-----------|-----------|
| C | -2.551502 | -0.186038 | -1.492543 |
| C | -1.636492 | -1.332021 | -1.028522 |
| C | -0.206708 | -0.799486 | -0.933632 |
| C | -2.509237 | 1.015415  | -0.507989 |
| C | -1.072754 | 1.469914  | -0.411076 |
| C | -2.080858 | -1.796276 | 0.371175  |
| C | -2.929392 | 0.503250  | 0.898203  |
| C | -2.018030 | -0.637367 | 1.383684  |
| C | -0.583166 | -0.112398 | 1.435134  |
| H | -2.259453 | 0.148611  | -2.495200 |
| H | -3.590606 | -0.532377 | -1.551759 |
| H | 0.162380  | -0.410461 | -1.885150 |
| H | 0.508054  | -1.535376 | -0.562457 |
| H | -3.106756 | -2.182436 | 0.321302  |
| H | 0.841510  | 0.712751  | 0.135676  |
| H | -3.966720 | 0.153809  | 0.829533  |
| H | -1.436295 | -2.616764 | 0.708881  |
| H | -2.909970 | 1.334048  | 1.614061  |
| H | 0.150767  | -0.867441 | 1.723758  |
| H | -0.484446 | 0.751116  | 2.098942  |
| B | 2.964432  | -0.357643 | 0.250520  |
| N | -0.162961 | 0.353715  | 0.054152  |
| O | -0.602777 | 2.546670  | -0.642722 |
| F | 2.804167  | -0.613854 | -1.120042 |
| F | 2.319558  | 0.941056  | 0.513002  |
| F | 4.273749  | -0.307573 | 0.652015  |
| F | 2.212320  | -1.317839 | 0.988722  |
| C | -3.400662 | 2.163103  | -0.979118 |
| H | -3.091179 | 2.519218  | -1.965060 |
| H | -4.436689 | 1.817208  | -1.040519 |
| H | -3.353110 | 3.006255  | -0.285137 |
| C | -2.430698 | -1.106222 | 2.782504  |
| H | -3.457447 | -1.485053 | 2.767685  |
| H | -1.775274 | -1.910031 | 3.131948  |
| H | -2.380572 | -0.284549 | 3.504848  |
| C | -1.671207 | -2.492868 | -2.027883 |
| H | -1.011812 | -3.304201 | -1.704570 |
| H | -2.687767 | -2.890165 | -2.111407 |
| H | -1.348783 | -2.166293 | -3.021990 |

### TPSSH

|   |           |           |           |
|---|-----------|-----------|-----------|
| C | -2.550016 | -0.186566 | -1.488023 |
| C | -1.636649 | -1.328998 | -1.025689 |
| C | -0.211233 | -0.795573 | -0.930607 |
| C | -2.506875 | 1.010059  | -0.506090 |
| C | -1.072058 | 1.460910  | -0.408819 |

|   |           |           |           |
|---|-----------|-----------|-----------|
| C | -2.078801 | -1.792144 | 0.370318  |
| C | -2.925856 | 0.500791  | 0.895524  |
| C | -2.016358 | -0.636324 | 1.379823  |
| C | -0.585093 | -0.111764 | 1.429077  |
| H | -2.259168 | 0.147001  | -2.488844 |
| H | -3.586519 | -0.532759 | -1.547643 |
| H | 0.156474  | -0.407829 | -1.880517 |
| H | 0.502198  | -1.530630 | -0.562702 |
| H | -3.101947 | -2.178754 | 0.321334  |
| H | 0.830298  | 0.709583  | 0.132902  |
| H | -3.960832 | 0.151754  | 0.828526  |
| H | -1.435089 | -2.610529 | 0.707087  |
| H | -2.906894 | 1.329699  | 1.610014  |
| H | 0.146539  | -0.865088 | 1.718458  |
| H | -0.486779 | 0.749061  | 2.092637  |
| B | 2.952491  | -0.356537 | 0.250140  |
| N | -0.168282 | 0.352053  | 0.053778  |
| O | -0.604298 | 2.532905  | -0.640049 |
| F | 2.790258  | -0.610840 | -1.115023 |
| F | 2.311690  | 0.933637  | 0.513489  |
| F | 4.258326  | -0.309469 | 0.645973  |
| F | 2.205033  | -1.313499 | 0.984870  |
| C | -3.392406 | 2.157038  | -0.975945 |
| H | -3.081879 | 2.513044  | -1.958985 |
| H | -4.427035 | 1.814722  | -1.039124 |
| H | -3.344397 | 2.997852  | -0.282869 |
| C | -2.426056 | -1.103341 | 2.775057  |
| H | -3.450550 | -1.481573 | 2.762115  |
| H | -1.771858 | -1.905237 | 3.123926  |
| H | -2.375573 | -0.283418 | 3.495815  |
| C | -1.668742 | -2.486530 | -2.021894 |
| H | -1.008984 | -3.294713 | -1.699371 |
| H | -2.681924 | -2.885993 | -2.105672 |
| H | -1.347544 | -2.160595 | -3.014029 |

### Cationic fragments

#### PBE0

#### (1)<sup>+</sup>

|   |           |           |           |
|---|-----------|-----------|-----------|
| C | -2.492368 | -0.190894 | -1.487730 |
| C | -1.608691 | -1.328674 | -0.981830 |
| C | -0.176006 | -0.836869 | -0.872577 |
| C | -2.449025 | 0.982715  | -0.491295 |
| C | -1.039857 | 1.442071  | -0.377284 |
| C | -2.089218 | -1.804439 | 0.388260  |
| C | -2.911538 | 0.508065  | 0.899203  |
| C | -2.022056 | -0.638696 | 1.373641  |

|   |           |           |           |
|---|-----------|-----------|-----------|
| C | -0.588766 | -0.148022 | 1.479562  |
| H | -2.175974 | 0.140058  | -2.479495 |
| H | -3.527481 | -0.525657 | -1.575515 |
| H | -1.620009 | -2.153026 | -1.697157 |
| H | 0.206413  | -0.451565 | -1.818952 |
| H | -3.040551 | 1.827338  | -0.842401 |
| H | 0.504815  | -1.604735 | -0.502249 |
| H | -3.115000 | -2.169801 | 0.315218  |
| H | 0.796576  | 0.697802  | 0.161940  |
| H | -3.947859 | 0.175105  | 0.818702  |
| H | -1.477558 | -2.639191 | 0.740216  |
| H | -2.894318 | 1.337564  | 1.609735  |
| H | 0.100155  | -0.929610 | 1.803236  |
| H | -2.333573 | -0.962241 | 2.368459  |
| H | -0.489140 | 0.709745  | 2.146385  |
| N | -0.141299 | 0.298102  | 0.114221  |
| O | -0.518261 | 2.478505  | -0.586399 |

**(2)<sup>+</sup>**

|   |           |           |           |
|---|-----------|-----------|-----------|
| C | -2.484844 | -0.180337 | -1.483531 |
| C | -1.610236 | -1.324051 | -0.979516 |
| C | -0.175788 | -0.841064 | -0.870080 |
| C | -2.458754 | 1.015203  | -0.504478 |
| C | -1.032443 | 1.443380  | -0.380048 |
| C | -2.094028 | -1.797935 | 0.389051  |
| C | -2.900674 | 0.519922  | 0.891431  |
| C | -2.021496 | -0.630754 | 1.370912  |
| C | -0.586775 | -0.148311 | 1.478774  |
| H | -2.167396 | 0.147445  | -2.476945 |
| H | -3.522469 | -0.509344 | -1.572710 |
| H | -1.628061 | -2.146917 | -1.696583 |
| H | 0.209049  | -0.458711 | -1.816656 |
| H | 0.501789  | -1.610593 | -0.497187 |
| H | -3.121805 | -2.157504 | 0.315230  |
| H | 0.796785  | 0.694176  | 0.159988  |
| H | -3.939714 | 0.193125  | 0.810402  |
| H | -1.486958 | -2.635434 | 0.742374  |
| H | -2.881819 | 1.350259  | 1.602269  |
| H | 0.099356  | -0.932329 | 1.802578  |
| H | -2.338897 | -0.948851 | 2.365748  |
| H | -0.483868 | 0.709675  | 2.144795  |
| N | -0.141191 | 0.294597  | 0.113522  |
| O | -0.494439 | 2.472898  | -0.586944 |
| C | -3.311329 | 2.168617  | -0.993737 |
| H | -2.979435 | 2.519732  | -1.970947 |
| H | -4.347765 | 1.840671  | -1.079596 |
| H | -3.272849 | 3.010506  | -0.302301 |

**(3)<sup>+</sup>**

|   |           |           |           |
|---|-----------|-----------|-----------|
| C | -2.511817 | -0.176649 | -1.478843 |
| C | -1.639275 | -1.340281 | -1.007457 |
| C | -0.208921 | -0.836776 | -0.881084 |



|   |           |           |           |
|---|-----------|-----------|-----------|
| C | -2.485460 | 1.008704  | -0.491839 |
| C | -1.061437 | 1.439279  | -0.368812 |
| C | -2.114532 | -1.797141 | 0.372724  |
| C | -2.920654 | 0.501731  | 0.898831  |
| C | -2.051003 | -0.656140 | 1.389364  |
| C | -0.613092 | -0.165303 | 1.471710  |
| H | -2.197873 | 0.158585  | -2.471814 |
| H | -3.549645 | -0.507213 | -1.569150 |
| H | 0.171558  | -0.446659 | -1.826961 |
| H | 0.470507  | -1.610298 | -0.518490 |
| H | -3.143158 | -2.159846 | 0.299601  |
| H | 0.766660  | 0.685960  | 0.159050  |
| H | -3.960274 | 0.173872  | 0.819455  |
| H | -1.507020 | -2.640064 | 0.717600  |
| H | -2.901633 | 1.325534  | 1.618512  |
| H | 0.074155  | -0.951667 | 1.789056  |
| H | -0.510242 | 0.687363  | 2.145542  |
| N | -0.171802 | 0.287664  | 0.111239  |
| O | -0.524851 | 2.471420  | -0.569063 |
| C | -3.343572 | 2.163734  | -0.969024 |
| H | -3.016232 | 2.523463  | -1.944644 |
| H | -4.379333 | 1.833362  | -1.053776 |
| H | -3.305131 | 3.000312  | -0.271157 |
| C | -2.492322 | -1.118892 | 2.767661  |
| H | -3.524322 | -1.470707 | 2.732951  |
| H | -1.872072 | -1.942497 | 3.126825  |
| H | -2.440311 | -0.308122 | 3.497339  |
| C | -1.671611 | -2.481923 | -2.009457 |
| H | -1.043329 | -3.313430 | -1.683997 |
| H | -2.689990 | -2.857555 | -2.117907 |
| H | -1.328157 | -2.158965 | -2.994450 |

## Products of Hydrolysis

(4)

### PBE

|   |           |          |           |
|---|-----------|----------|-----------|
| C | -0.738186 | 1.664980 | -2.323863 |
| C | -0.174001 | 0.398835 | -1.634260 |
| C | 1.348209  | 0.330739 | -1.506209 |
| C | -0.771331 | 2.967361 | -1.484899 |
| C | -0.784024 | 0.237264 | -0.236678 |

|   |           |           |           |
|---|-----------|-----------|-----------|
| C | -1.073119 | 2.711336  | 0.012317  |
| C | -0.386357 | 1.463528  | 0.594040  |
| C | 1.142959  | 1.532114  | 0.713146  |
| H | -0.217306 | 1.843869  | -3.273109 |
| H | -1.781525 | 1.427894  | -2.582174 |
| H | -0.455672 | -0.459647 | -2.263011 |
| H | 1.872148  | 0.473469  | -2.458314 |
| H | 1.649506  | -0.636066 | -1.079927 |
| H | -1.880053 | 0.168325  | -0.297424 |
| H | -2.156503 | 2.560064  | 0.129144  |
| H | -0.423893 | -0.691867 | 0.232558  |
| H | -0.814383 | 3.614120  | 0.581627  |
| H | 1.498137  | 0.702028  | 1.339291  |
| H | -0.750712 | 1.345985  | 1.626463  |
| H | 1.482049  | 2.472027  | 1.167076  |
| B | 4.564336  | 2.524963  | -1.664554 |
| F | 3.918948  | 1.754021  | -2.659683 |
| F | 3.792451  | 3.729684  | -1.475457 |
| F | 5.873400  | 2.801712  | -1.948942 |
| F | 4.456699  | 1.769024  | -0.416694 |
| N | 1.859098  | 1.403217  | -0.597598 |
| H | 1.804742  | 2.277677  | -1.147257 |
| H | 2.902643  | 1.318781  | -0.438240 |
| H | -1.600864 | 3.582198  | -1.870469 |
| C | 0.424302  | 3.918840  | -1.602757 |
| O | 0.535685  | 4.932505  | -0.947710 |
| O | 1.363261  | 3.485137  | -2.486089 |
| H | 2.216397  | 3.976823  | -2.343428 |

## PBE0

|   |           |           |           |
|---|-----------|-----------|-----------|
| C | -0.742711 | 1.664462  | -2.316940 |
| C | -0.166989 | 0.414892  | -1.631545 |
| C | 1.346823  | 0.355769  | -1.517135 |
| C | -0.776034 | 2.959846  | -1.487375 |
| C | -0.758038 | 0.254561  | -0.236823 |
| C | -1.055543 | 2.710610  | 0.004034  |
| C | -0.360626 | 1.477082  | 0.580889  |
| C | 1.160105  | 1.548735  | 0.688501  |
| H | -0.236863 | 1.841832  | -3.266442 |
| H | -1.780088 | 1.421408  | -2.561557 |
| H | -0.445105 | -0.442514 | -2.250093 |
| H | 1.857385  | 0.500163  | -2.467265 |
| H | 1.648614  | -0.608403 | -1.103640 |
| H | -1.846945 | 0.178027  | -0.284562 |
| H | -2.129657 | 2.553676  | 0.132373  |
| H | -0.387934 | -0.664842 | 0.226786  |
| H | -0.800178 | 3.611161  | 0.564328  |
| H | 1.512155  | 0.730248  | 1.319100  |
| H | -0.713524 | 1.362965  | 1.609644  |
| H | 1.498680  | 2.485906  | 1.131498  |
| B | 4.539214  | 2.487391  | -1.608030 |
| F | 3.907617  | 1.769844  | -2.632837 |
| F | 3.742991  | 3.634071  | -1.340231 |

|   |           |          |           |
|---|-----------|----------|-----------|
| F | 5.822802  | 2.816709 | -1.896646 |
| F | 4.472674  | 1.664200 | -0.428261 |
| N | 1.866885  | 1.408544 | -0.611623 |
| H | 1.847709  | 2.281653 | -1.144816 |
| H | 2.891017  | 1.284551 | -0.448811 |
| H | -1.605505 | 3.566441 | -1.864066 |
| C | 0.403204  | 3.909982 | -1.624608 |
| O | 0.503350  | 4.925074 | -0.995106 |
| O | 1.333327  | 3.484475 | -2.491869 |
| H | 2.148227  | 4.012422 | -2.389955 |

**(5)**

**PBE**

|   |           |           |           |
|---|-----------|-----------|-----------|
| C | -0.761078 | 1.618285  | -2.333195 |
| C | -0.084664 | 0.426599  | -1.626551 |
| C | 1.433169  | 0.503819  | -1.462289 |
| C | -0.835020 | 2.938970  | -1.528220 |
| C | -0.721076 | 0.206444  | -0.250015 |
| C | -1.162938 | 2.666681  | -0.042127 |
| C | -0.446148 | 1.457528  | 0.590670  |
| C | 1.067170  | 1.590631  | 0.814616  |
| H | -0.294204 | 1.804242  | -3.308414 |
| H | -1.800010 | 1.310723  | -2.534531 |
| H | -0.256902 | -0.458107 | -2.259292 |
| H | 1.965996  | 0.750347  | -2.387712 |
| H | 1.810040  | -0.463442 | -1.102172 |
| H | -1.805188 | 0.049968  | -0.349011 |
| H | -2.243068 | 2.462273  | 0.026218  |
| H | -0.302000 | -0.691282 | 0.231664  |
| H | -0.969043 | 3.580305  | 0.534876  |
| H | 1.410887  | 0.759740  | 1.445879  |
| H | -0.869522 | 1.327142  | 1.598994  |
| H | 1.330838  | 2.535700  | 1.304553  |
| B | 4.555326  | 2.359676  | -1.770349 |
| F | 4.085320  | 1.520195  | -2.795475 |
| F | 3.611689  | 3.449831  | -1.621746 |
| F | 5.826119  | 2.825388  | -1.975918 |
| F | 4.485642  | 1.605823  | -0.515348 |
| N | 1.871981  | 1.525636  | -0.449117 |
| H | 1.916993  | 2.457642  | -0.886211 |
| H | 2.903579  | 1.378011  | -0.256419 |
| C | 0.450634  | 3.775059  | -1.604587 |
| O | 0.838499  | 4.503506  | -0.707367 |
| O | 1.129722  | 3.609262  | -2.761699 |
| H | 2.024618  | 4.010017  | -2.640501 |
| C | -1.928800 | 3.844147  | -2.137976 |
| H | -1.713045 | 4.067518  | -3.191270 |
| H | -2.900741 | 3.334381  | -2.084045 |
| H | -2.001482 | 4.792190  | -1.588631 |

**PBE0**

|   |           |           |           |
|---|-----------|-----------|-----------|
| C | -0.750444 | 1.621875  | -2.325217 |
| C | -0.077572 | 0.440412  | -1.620826 |
| C | 1.431197  | 0.521350  | -1.455445 |
| C | -0.827306 | 2.932737  | -1.524674 |
| C | -0.712302 | 0.221418  | -0.254692 |
| C | -1.152986 | 2.664069  | -0.048837 |
| C | -0.439788 | 1.464123  | 0.581362  |
| C | 1.064205  | 1.596669  | 0.805494  |
| H | -0.284592 | 1.807483  | -3.293076 |
| H | -1.781139 | 1.315478  | -2.528670 |
| H | -0.244303 | -0.439201 | -2.248811 |
| H | 1.955622  | 0.770871  | -2.376124 |
| H | 1.805942  | -0.443276 | -1.108545 |
| H | -1.789111 | 0.066685  | -0.355327 |
| H | -2.225969 | 2.460221  | 0.020276  |
| H | -0.298181 | -0.671722 | 0.223149  |
| H | -0.962560 | 3.571683  | 0.524883  |
| H | 1.400484  | 0.774499  | 1.439814  |
| H | -0.860731 | 1.334569  | 1.582502  |
| H | 1.323407  | 2.537228  | 1.290370  |
| B | 4.530570  | 2.347394  | -1.767131 |
| F | 4.092302  | 1.519898  | -2.794859 |
| F | 3.570690  | 3.398385  | -1.614819 |
| F | 5.777315  | 2.846094  | -1.963674 |
| F | 4.475345  | 1.589586  | -0.541823 |
| N | 1.867477  | 1.525757  | -0.443527 |
| H | 1.937882  | 2.450534  | -0.870513 |
| H | 2.878355  | 1.359286  | -0.244220 |
| C | 0.449676  | 3.759836  | -1.605022 |
| O | 0.849242  | 4.459606  | -0.708059 |
| O | 1.103416  | 3.620940  | -2.757418 |
| H | 1.985149  | 4.021805  | -2.655061 |
| C | -1.911650 | 3.832476  | -2.133449 |
| H | -1.691523 | 4.057268  | -3.178147 |
| H | -2.877575 | 3.326092  | -2.086952 |
| H | -1.987252 | 4.772720  | -1.585650 |

**(6)**

**PBE**

|   |           |           |           |
|---|-----------|-----------|-----------|
| C | -2.554297 | -0.113331 | -1.491501 |
| C | -1.666605 | -1.282906 | -1.039539 |
| C | -0.216555 | -0.813666 | -0.934743 |
| C | -2.478158 | 1.065653  | -0.493935 |
| C | -1.005651 | 1.533003  | -0.411394 |
| C | -2.138691 | -1.781163 | 0.335938  |
| C | -2.905821 | 0.548255  | 0.898555  |
| C | -2.022235 | -0.626588 | 1.342953  |
| C | -0.571410 | -0.158444 | 1.412732  |
| H | -2.282492 | 0.212330  | -2.512092 |
| H | -3.604391 | -0.436165 | -1.557626 |
| H | -1.712750 | -2.096500 | -1.777716 |
| H | 0.199880  | -0.450461 | -1.881409 |

|   |           |           |           |
|---|-----------|-----------|-----------|
| H | 0.465614  | -1.588364 | -0.565068 |
| H | -3.181560 | -2.127642 | 0.275667  |
| H | 0.847654  | 0.680105  | 0.125034  |
| H | -3.957529 | 0.228154  | 0.837581  |
| H | -1.525642 | -2.635430 | 0.660220  |
| H | -2.855622 | 1.369664  | 1.626887  |
| H | 0.134548  | -0.950555 | 1.690457  |
| H | -2.323919 | -0.962555 | 2.345588  |
| H | -0.440817 | 0.683882  | 2.100156  |
| B | 3.026981  | 0.051357  | 0.066068  |
| N | -0.151830 | 0.313557  | 0.050459  |
| O | -0.852889 | 2.524297  | 0.537968  |
| F | 2.800259  | -0.199278 | -1.298646 |
| F | 2.252136  | 1.282364  | 0.394423  |
| F | 4.347914  | 0.250592  | 0.380825  |
| F | 2.426517  | -0.981641 | 0.838151  |
| O | -0.458887 | 1.993435  | -1.607067 |
| H | 0.031747  | 2.918908  | 0.414204  |
| H | -0.814379 | 1.487491  | -2.355857 |
| C | -3.369765 | 2.224032  | -0.940064 |
| H | -3.079653 | 2.601416  | -1.929686 |
| H | -4.412471 | 1.882932  | -0.997693 |
| H | -3.315287 | 3.057388  | -0.229181 |

## PBE0

|   |           |           |           |
|---|-----------|-----------|-----------|
| C | -2.546629 | -0.113458 | -1.481777 |
| C | -1.663829 | -1.274715 | -1.032350 |
| C | -0.224237 | -0.804421 | -0.924314 |
| C | -2.467563 | 1.056273  | -0.490978 |
| C | -1.003528 | 1.514048  | -0.402980 |
| C | -2.134029 | -1.768954 | 0.334159  |
| C | -2.896642 | 0.546390  | 0.891766  |
| C | -2.019977 | -0.621509 | 1.334423  |
| C | -0.578107 | -0.154994 | 1.402477  |
| H | -2.279452 | 0.210006  | -2.495718 |
| H | -3.589340 | -0.435115 | -1.546139 |
| H | -1.705770 | -2.083495 | -1.765017 |
| H | 0.191788  | -0.448008 | -1.865387 |
| H | 0.453442  | -1.572685 | -0.555874 |
| H | -3.169622 | -2.112932 | 0.273531  |
| H | 0.819651  | 0.672948  | 0.124168  |
| H | -3.942268 | 0.231418  | 0.832526  |
| H | -1.525783 | -2.617408 | 0.658613  |
| H | -2.842420 | 1.363611  | 1.613972  |
| H | 0.122059  | -0.942686 | 1.677995  |
| H | -2.318448 | -0.955073 | 2.330573  |
| H | -0.449817 | 0.680340  | 2.087364  |
| B | 2.986443  | 0.075444  | 0.050580  |
| N | -0.164741 | 0.314591  | 0.051680  |
| O | -0.857222 | 2.496359  | 0.536495  |
| F | 2.742848  | -0.154739 | -1.301401 |
| F | 2.238589  | 1.280858  | 0.401485  |
| F | 4.302592  | 0.249662  | 0.343295  |

|   |           |           |           |
|---|-----------|-----------|-----------|
| F | 2.395630  | -0.958235 | 0.801525  |
| O | -0.462911 | 1.977015  | -1.582502 |
| H | 0.009645  | 2.902942  | 0.414970  |
| H | -0.726829 | 1.428162  | -2.323357 |
| C | -3.343769 | 2.213293  | -0.936837 |
| H | -3.053040 | 2.580218  | -1.922031 |
| H | -4.383244 | 1.884789  | -0.989946 |
| H | -3.279527 | 3.044189  | -0.234339 |

(7)

**PBE**

|   |           |           |           |
|---|-----------|-----------|-----------|
| C | -2.566373 | -0.113445 | -1.480074 |
| C | -1.676215 | -1.296174 | -1.057617 |
| C | -0.230953 | -0.803420 | -0.943840 |
| C | -2.490126 | 1.060600  | -0.481005 |
| C | -1.021484 | 1.536845  | -0.408842 |
| C | -2.132713 | -1.773102 | 0.333403  |
| C | -2.903645 | 0.537784  | 0.910484  |
| C | -2.022782 | -0.638539 | 1.367455  |
| C | -0.571254 | -0.156793 | 1.404188  |
| H | -2.301899 | 0.214925  | -2.502616 |
| H | -3.615356 | -0.443117 | -1.543069 |
| H | 0.178659  | -0.438686 | -1.893811 |
| H | 0.455986  | -1.578431 | -0.581901 |
| H | -3.176553 | -2.123595 | 0.279640  |
| H | 0.836828  | 0.685044  | 0.111746  |
| H | -3.954742 | 0.211387  | 0.858697  |
| H | -1.517332 | -2.630123 | 0.651471  |
| H | -2.852646 | 1.356232  | 1.643231  |
| H | 0.139519  | -0.946944 | 1.677619  |
| H | -0.440785 | 0.684171  | 2.094354  |
| B | 3.018833  | 0.054184  | 0.027422  |
| N | -0.163483 | 0.318971  | 0.042726  |
| O | -0.865935 | 2.526800  | 0.541596  |
| F | 2.784222  | -0.192475 | -1.336508 |
| F | 2.245905  | 1.283328  | 0.364844  |
| F | 4.341760  | 0.252870  | 0.334894  |
| F | 2.424397  | -0.982305 | 0.800175  |
| O | -0.486174 | 2.004775  | -1.607033 |
| H | 0.015212  | 2.926552  | 0.410407  |
| H | -0.827662 | 1.485010  | -2.352943 |
| C | -3.392899 | 2.214670  | -0.917163 |
| H | -3.112218 | 2.596343  | -1.907777 |
| H | -4.433895 | 1.867332  | -0.967490 |
| H | -3.338220 | 3.046411  | -0.204355 |
| C | -1.746663 | -2.428025 | -2.080088 |
| H | -1.104203 | -3.268207 | -1.781730 |
| H | -2.776108 | -2.802346 | -2.170105 |
| H | -1.419534 | -2.088544 | -3.073651 |
| C | -2.433205 | -1.119242 | 2.757326  |
| H | -3.474944 | -1.469721 | 2.750818  |

|   |           |           |          |
|---|-----------|-----------|----------|
| H | -1.797921 | -1.951520 | 3.092233 |
| H | -2.352561 | -0.309902 | 3.497062 |

**PBE0**

|   |           |           |           |
|---|-----------|-----------|-----------|
| C | -2.560034 | -0.116445 | -1.469882 |
| C | -1.673043 | -1.288534 | -1.049529 |
| C | -0.238827 | -0.793180 | -0.935644 |
| C | -2.480045 | 1.049815  | -0.478986 |
| C | -1.019559 | 1.516301  | -0.400918 |
| C | -2.126136 | -1.762627 | 0.331992  |
| C | -2.894696 | 0.534770  | 0.903301  |
| C | -2.020301 | -0.634336 | 1.357991  |
| C | -0.577759 | -0.155115 | 1.393866  |
| H | -2.303215 | 0.207113  | -2.487730 |
| H | -3.601671 | -0.445187 | -1.528172 |
| H | 0.163681  | -0.429563 | -1.880411 |
| H | 0.446619  | -1.561014 | -0.579188 |
| H | -3.161443 | -2.114685 | 0.278371  |
| H | 0.809341  | 0.675920  | 0.111112  |
| H | -3.939928 | 0.214413  | 0.853424  |
| H | -1.512924 | -2.611955 | 0.650387  |
| H | -2.839617 | 1.349403  | 1.629820  |
| H | 0.126054  | -0.942347 | 1.664020  |
| H | -0.448745 | 0.677872  | 2.082564  |
| B | 2.980480  | 0.067399  | 0.016664  |
| N | -0.176470 | 0.319077  | 0.044166  |
| O | -0.871169 | 2.496974  | 0.540790  |
| F | 2.738175  | -0.167930 | -1.334011 |
| F | 2.234409  | 1.274303  | 0.364226  |
| F | 4.297158  | 0.241318  | 0.309975  |
| F | 2.389277  | -0.963737 | 0.772081  |
| O | -0.488162 | 1.982004  | -1.583317 |
| H | -0.007913 | 2.909190  | 0.413926  |
| H | -0.792467 | 1.460912  | -2.328689 |
| C | -3.368029 | 2.202494  | -0.914337 |
| H | -3.091379 | 2.572495  | -1.902616 |
| H | -4.406118 | 1.868138  | -0.956514 |
| H | -3.300717 | 3.033166  | -0.211867 |
| C | -1.738741 | -2.414954 | -2.063577 |
| H | -1.102103 | -3.249310 | -1.762896 |
| H | -2.761061 | -2.787111 | -2.156213 |
| H | -1.410823 | -2.081485 | -3.051070 |
| C | -2.426976 | -1.112914 | 2.739277  |
| H | -3.461225 | -1.462997 | 2.731916  |
| H | -1.794249 | -1.939148 | 3.071056  |
| H | -2.348811 | -0.308924 | 3.474815  |

**Transition state**

**PBE**

**(8)**

|   |           |          |           |
|---|-----------|----------|-----------|
| C | -0.836487 | 1.726841 | -2.207647 |
|---|-----------|----------|-----------|

|   |           |           |           |
|---|-----------|-----------|-----------|
| C | -0.585126 | 0.353918  | -1.544529 |
| C | 0.839981  | -0.185842 | -1.719272 |
| C | -0.481529 | 2.998837  | -1.373664 |
| C | -0.908893 | 0.409261  | -0.048320 |
| C | -0.236300 | 2.815056  | 0.163574  |
| C | 0.076696  | 1.381428  | 0.608468  |
| C | 1.516405  | 0.920722  | 0.359795  |
| H | -0.330934 | 1.782196  | -3.179552 |
| H | -1.914746 | 1.797784  | -2.407105 |
| H | -1.262197 | -0.355390 | -2.044651 |
| H | 1.098258  | -0.256264 | -2.786062 |
| H | 0.878711  | -1.208882 | -1.293984 |
| H | -1.948377 | 0.733811  | 0.120649  |
| H | -1.174567 | 3.118214  | 0.649501  |
| H | -0.805474 | -0.594456 | 0.390370  |
| H | 0.547734  | 3.502404  | 0.499169  |
| H | 1.665822  | -0.026799 | 0.915184  |
| H | -0.067930 | 1.372945  | 1.700155  |
| H | 2.237315  | 1.655853  | 0.734069  |
| B | 3.880879  | 3.702846  | -0.738434 |
| F | 3.926266  | 4.024441  | -2.143113 |
| F | 2.503703  | 3.887686  | -0.318621 |
| F | 4.711923  | 4.530122  | -0.016572 |
| F | 4.203548  | 2.336630  | -0.580115 |
| N | 1.788984  | 0.722919  | -1.073036 |
| H | 1.957391  | 1.888988  | -2.206257 |
| H | 2.755465  | 0.407117  | -1.176241 |
| H | -1.346983 | 3.683200  | -1.459431 |
| C | 0.518338  | 3.893781  | -1.983313 |
| O | 0.786640  | 4.962338  | -2.301540 |
| O | 1.957476  | 2.514386  | -3.024299 |
| H | 2.745049  | 3.104847  | -2.858260 |

**(9)**

**PBE**

|   |           |           |           |
|---|-----------|-----------|-----------|
| C | -2.456162 | 0.095310  | -0.995207 |
| C | -1.543915 | -1.070229 | -0.580094 |
| C | -0.108257 | -0.549981 | -0.527486 |
| C | -2.362697 | 1.272426  | -0.008479 |
| C | -0.917180 | 1.752325  | 0.141744  |
| C | -1.942416 | -1.537934 | 0.831611  |
| C | -2.731426 | 0.764361  | 1.411224  |
| C | -1.815779 | -0.392385 | 1.852153  |
| C | -0.369175 | 0.110577  | 1.844552  |
| H | -2.192631 | 0.428428  | -2.012874 |
| H | -3.503429 | -0.244703 | -1.035487 |
| H | 0.238519  | -0.164555 | -1.492830 |
| H | 0.610317  | -1.308423 | -0.194111 |
| H | -2.980698 | -1.908234 | 0.820749  |
| H | 1.012175  | 0.925833  | 0.493651  |
| H | -3.779099 | 0.424914  | 1.390939  |
| H | -1.300624 | -2.379825 | 1.136294  |
| H | -2.665015 | 1.598492  | 2.125620  |
| H | 0.365197  | -0.662519 | 2.101615  |



|   |           |           |           |
|---|-----------|-----------|-----------|
| H | -0.228879 | 0.970938  | 2.510851  |
| B | 3.148906  | -0.060018 | 0.396871  |
| N | -0.009935 | 0.577414  | 0.458161  |
| O | -0.631132 | 2.839281  | 0.795400  |
| F | 2.924720  | -0.348570 | -0.958874 |
| F | 2.472231  | 1.236206  | 0.669971  |
| F | 4.477323  | 0.050635  | 0.726413  |
| F | 2.466331  | -1.019110 | 1.201114  |
| O | -0.241329 | 2.288820  | -1.296536 |
| H | -0.110339 | 3.076810  | -0.407394 |
| H | -0.968045 | 2.601733  | -1.869752 |
| C | -3.271805 | 2.429628  | -0.415619 |
| H | -3.079243 | 2.763258  | -1.447917 |
| H | -4.320768 | 2.107285  | -0.379144 |
| H | -3.140769 | 3.286612  | 0.255461  |
| C | -1.628420 | -2.216596 | -1.585227 |
| H | -0.961693 | -3.041083 | -1.297493 |
| H | -2.653435 | -2.609655 | -1.637705 |
| H | -1.338771 | -1.884038 | -2.592283 |
| C | -2.177353 | -0.864396 | 3.258983  |
| H | -3.214291 | -1.227036 | 3.288508  |
| H | -1.521864 | -1.686198 | 3.579146  |
| H | -2.081753 | -0.048073 | 3.988924  |

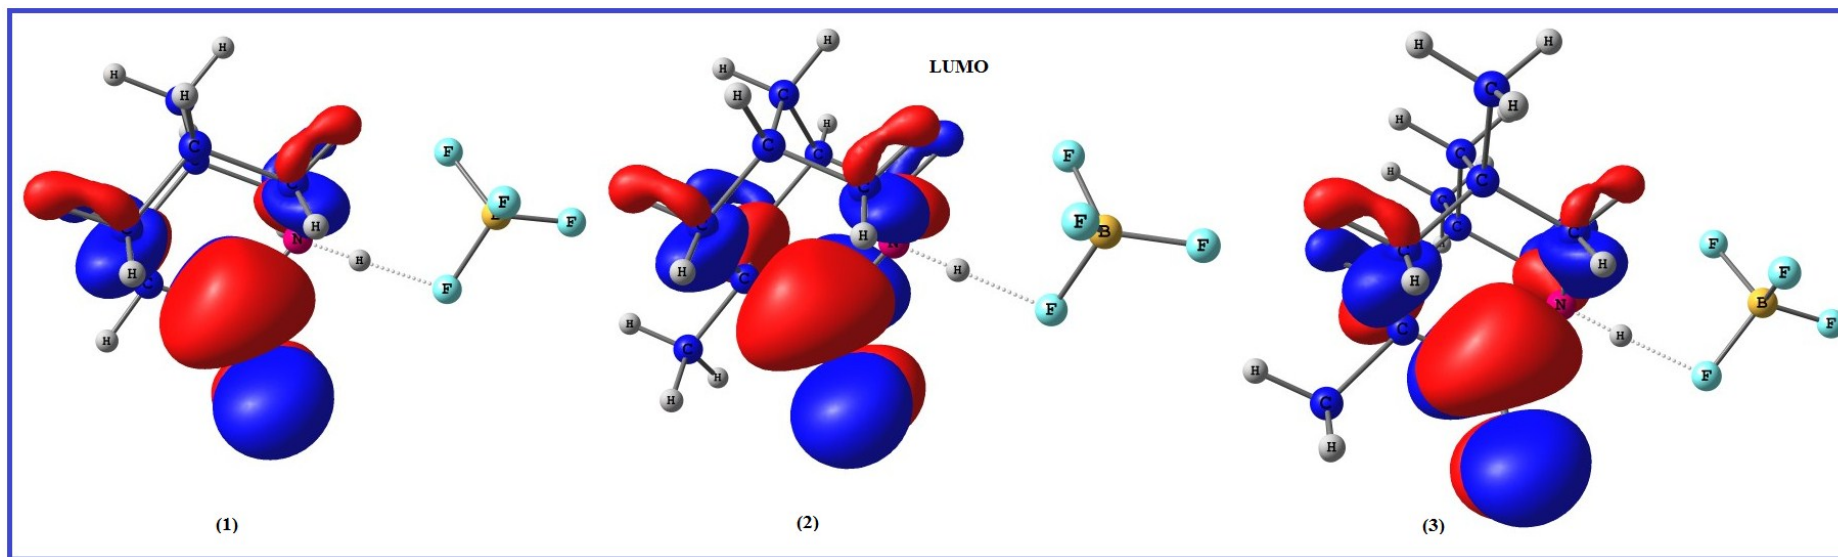

**Figure S1.** LUMO of the Tetrafluoroboric Acid Salts of Twisted Amides (1-3)

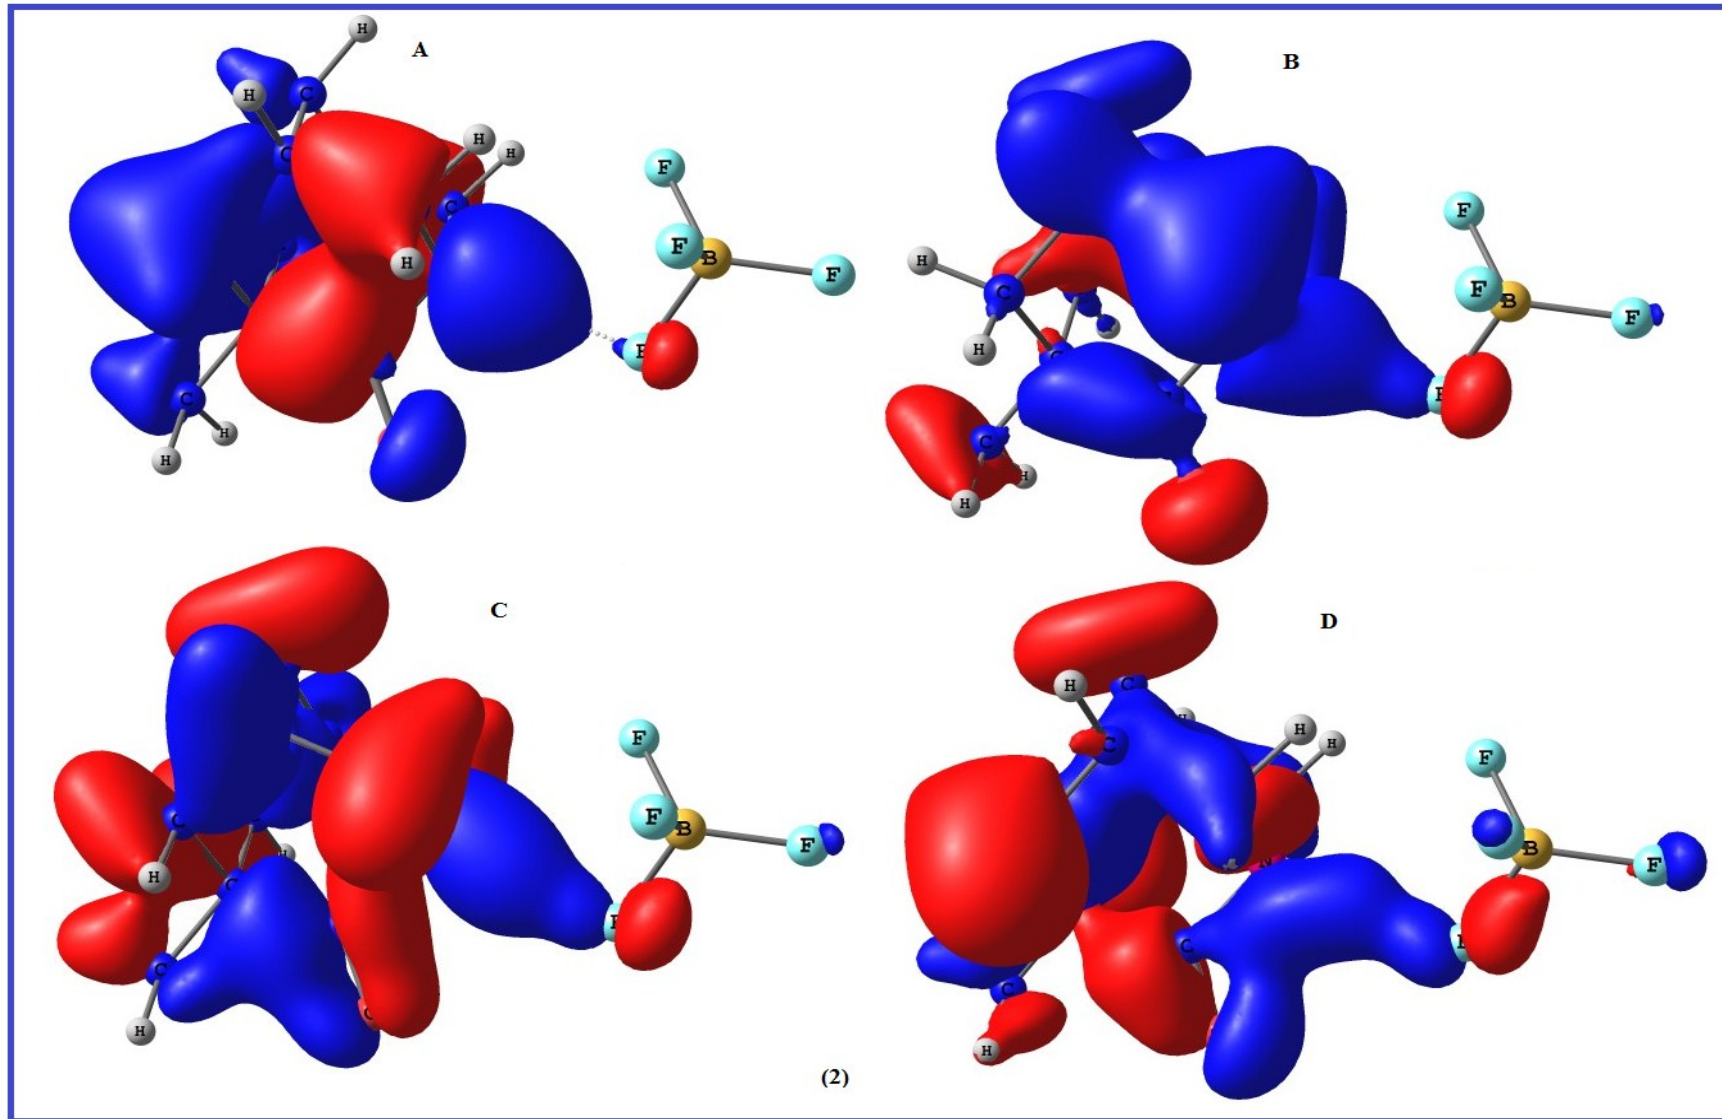

**Figure S2.** Important Molecular Orbitals of Salt (2)

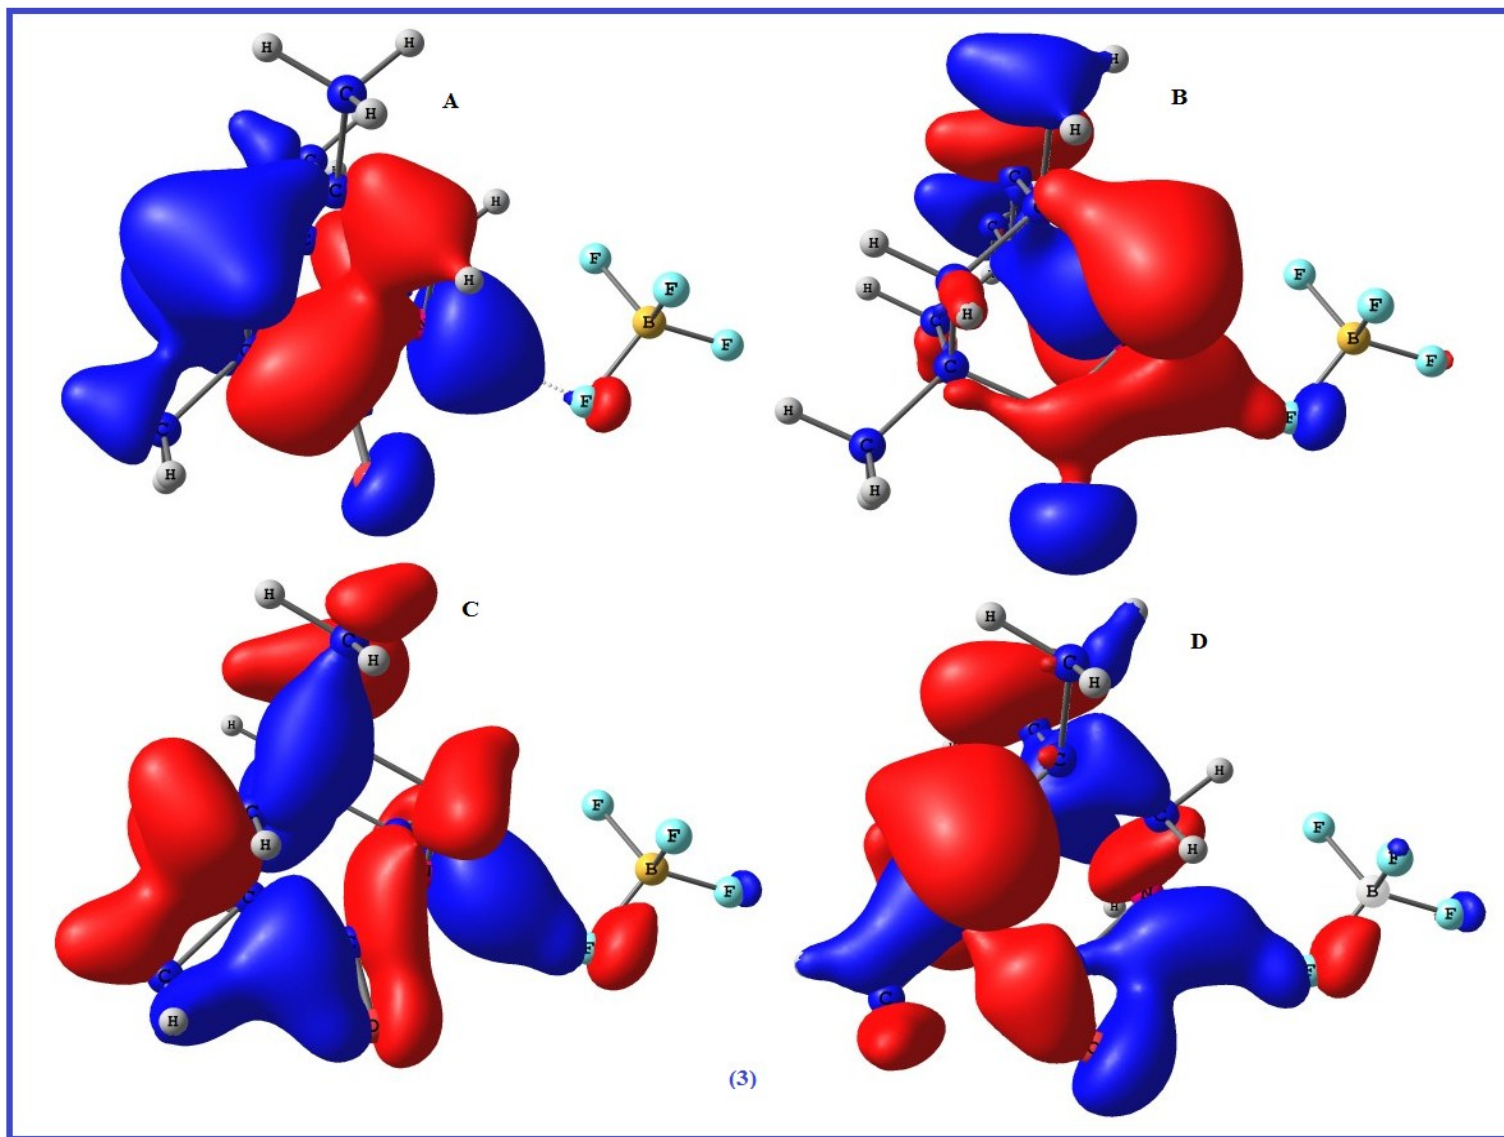

**Figure S3.** Important Molecular Orbitals of Salt (3)
